# Supplementary material for: Synthesis and characterization of cis and trans cobalt(ii) nalidixate complexes having a 1-(4-chlorophenyl)-3-(pyridin-4-ylmethyl)urea ligand
Source: Royal Society of Chemistry journal article supplement (doi:10.1039/d4dt01401d), 2024-01-01
Supplement: d4dt01401d1.pdf [file d4dt01401d1.pdf]

## Supporting Information

### Synthesis and Characterization of *Cis* and *Trans* Cobalt (II) nalidixate Complexes

#### Having 1-(4-chlorophenyl)-3-(pyridin-4-ylmethyl)urea Ligand

Rinki Brahma, Abhay Pratap Singh, Jubaraj Bikash Baruah\*

**Abbreviation used:** *cis*-[Co(L)<sub>2</sub>(NALD)<sub>2</sub>] $\cdot$ 0.5DMF $\cdot$ H<sub>2</sub>O = *CisCoNalurea*

*trans*-[Co(L)<sub>2</sub>(NALD)<sub>2</sub>] $\cdot$ 2DMF $\cdot$ 2H<sub>2</sub>O = *TransCoNalurea*

### Table of contents

|            |                                                                                                                                                                                                                                                                                                  |
|------------|--------------------------------------------------------------------------------------------------------------------------------------------------------------------------------------------------------------------------------------------------------------------------------------------------|
| Table S1   | Crystallographic and refinement parameters of the ligand <b>L</b> , <i>CisCoNalurea</i> , and <i>TransCoNalurea</i> .                                                                                                                                                                            |
| Table S2   | Metal-ligand bond lengths of <i>CisCoNalurea</i> , and <i>TransCoNalurea</i> compared with the bond lengths of the optimized structure.                                                                                                                                                          |
| Table S3   | Hydrogen bond parameters of <b>L</b> , <i>CisCoNalurea</i> , and <i>TransCoNalurea</i> .                                                                                                                                                                                                         |
| Figure S1  | (a) Crystal structure of <b>L</b> determined by X-ray single crystal diffraction (Thermal ellipsoids are drawn at 50% probability); (b) Hydrogen bonds in symmetry non-equivalent molecules; and (c) $\pi$ -interactions, C-H $\cdots$ O and C-H $\cdots$ N interactions in the crystal lattice. |
| Figure S2  | Optimized structures of <i>CisCoNalurea</i> , and <i>TransCoNalurea</i> with their calculated dipole moments. (DFT calculation was done with B3LYP functional using 6-31G as the basis set).                                                                                                     |
| Figure S3  | FTIR spectra of the solid samples of (a) <b>L</b> , (b) <i>CisCoNalurea</i> , and (c) <i>TransCoNalurea</i> .                                                                                                                                                                                    |
| Figure S4  | FTIR spectra of a solid sample of <i>CisCoNalurea</i> (a) (i) as synthesized, (ii) after heating at 180°C for seven days, (b) expansion in the region 1780-1400 cm <sup>-1</sup> .                                                                                                               |
| Figure S5  | FTIR spectra of a solid sample of <i>TransCoNalurea</i> (a) (i) as synthesized, (ii) after heating in a laboratory oven at 110°C for 14 days, (b) expansion in the region 1780-1400 cm <sup>-1</sup> .                                                                                           |
| Figure S6  | ESI-Mass spectrum of <b>L</b> .                                                                                                                                                                                                                                                                  |
| Figure S7  | <sup>1</sup> H-NMR (DMSO-d <sub>6</sub> , 500 MHz) spectrum of <b>L</b> .                                                                                                                                                                                                                        |
| Figure S8  | <sup>13</sup> C-NMR (DMSO-d <sub>6</sub> , 125 MHz) spectrum of <b>L</b> .                                                                                                                                                                                                                       |
| Figure S9  | <sup>1</sup> H-HOMOCOSY (DMSO-d <sub>6</sub> , 500 MHz) spectrum of <b>L</b> (the coupling correlations are explained at the bottom).                                                                                                                                                            |
| Figure S10 | <sup>1</sup> H-NMR (DMSO-d <sub>6</sub> , 400 MHz) spectrum of <b>HNALD</b> .                                                                                                                                                                                                                    |
| Figure S11 | <sup>1</sup> H-NMR {Methanol-d <sub>4</sub> /acetone-d <sub>6</sub> (1:3 v/v), 400MHz} spectrum of <i>CisCoNalurea</i> .                                                                                                                                                                         |
| Figure S12 | <sup>1</sup> H-NMR {Methanol-d <sub>4</sub> /acetone-d <sub>6</sub> (1:3 v/v), 400MHz} spectrum of <i>TransCoNalurea</i> .                                                                                                                                                                       |

---

|             |                                                                                                                                                                                                                                                                                                                                          |
|-------------|------------------------------------------------------------------------------------------------------------------------------------------------------------------------------------------------------------------------------------------------------------------------------------------------------------------------------------------|
| Figure S13  | Powder X-ray diffraction pattern of (a) <b>L</b> , (b) <i>CisCoNalurea</i> , and (c) <i>TransCoNalurea</i> .                                                                                                                                                                                                                             |
| Figure S14  | Powder X-ray diffraction patterns of the solid samples obtained from the heating reaction of <b>L</b> , <b>HNALD</b> , and $\text{Co}(\text{NO}_3)_2 \cdot 6\text{H}_2\text{O}$ at 80°C for (a) one hour giving <i>TransCoNalurea</i> , and (b) two hours giving <i>CisCoNalurea</i> {(i) simulated and (ii) experimental patterns}.     |
| Figure S15  | Comparison of the powder X-ray diffraction patterns of (i) <i>CisCoNalurea</i> ; (ii) <i>TransCoNalurea</i> ; (iii) and (iv) are the powder X-ray patterns of the products formed by using TBACl and TBABr salts for <i>cis</i> -to- <i>trans</i> -isomer conversion respectively.                                                       |
| Figure S16  | The plot of weight vs temperature observed from thermogravimetry of (a) <i>CisCoNalurea</i> , and (b) <i>TransCoNalurea</i> .                                                                                                                                                                                                            |
| Figure S17  | FESEM images of (a) <b>L</b> ; (b) and (c) <i>CisCoNalurea</i> (at two magnifications); (d) and (e) <i>TransCoNalurea</i> (at two magnifications).                                                                                                                                                                                       |
| Figure S18  | Optical rotation versus concentration plot of <i>CisCoNalurea</i> in binary solvents (a) THF-DMF (2:2 v/v), (b) DCM-acetone (1:3 v/v), (c) methanol-acetone (1:3 v/v), and (d) DMF.                                                                                                                                                      |
| Figure S19  | Size distribution plot of <i>CisCoNalurea</i> in THF-DMF (2:1 v/v) mixture at different concentrations (a) 0.182 mM, (b) 0.11 mM, (c) 0.036 mM, (d) 0.007 mM, and (e) comparative size distribution plot of these three concentrations (obtained from DLS data).                                                                         |
| Figure S20  | Size distribution plot of <i>CisCoNalurea</i> in methanol-acetone (1:3 v/v) mixture at different concentrations (a) 0.182 mM, (b) 0.11 mM, (c) 0.036 mM, (d) 0.007 mM, and (e) comparative size distribution plot of these three concentrations from dynamic light scattering.                                                           |
| Figure S21  | Size distribution plot of <i>CisCoNalurea</i> in DCM-acetone (1:3 v/v) mixture at different concentrations (a) 0.182 mM, (b) 0.11 mM, (c) 0.036 mM, (d) 0.007 mM and (e) comparative size distribution plot of these three concentrations from dynamic light scattering.                                                                 |
| Figure S22  | Size distribution plot of <i>CisCoNalurea</i> in DMF at different concentrations (a) 0.182 mM, (b) 0.11 mM, (c) 0.036 mM, (d) 0.007 mM, and (e) comparative size distribution plot of these three concentrations from dynamic light scattering.                                                                                          |
| Figure S23  | Plots of average particle size ( $Z_{av}$ ) versus concentration of <i>CisCoNalurea</i> at different concentrations (a) (i) THF-DMF (2:1 v/v), (ii) DCM-acetone (1:3 v/v), (iii) methanol-acetone (1:3 v/v), and (b) DMF.                                                                                                                |
| Figure S24  | UV-visible spectra, and (b) visible spectra of <i>CisCoNalurea</i> in (a) DMF ( $1.14 \times 10^{-3}$ M), and in binary solvents (b) THF-DMF (2:2 v/v), (c) DCM-acetone (1:3 v/v), and (d) methanol-acetone (1:3 v/v); concentration of <i>CisCoNalurea</i> in binary solvents = $1.5 \times 10^{-2}$ M (cuvette used: 1mm path-length). |
| Figure S25  | Visible absorption titration of <i>CisCoNalurea</i> in DMF ( $23 \times 10^{-4}$ M) with (a) 20 $\mu$ L aliquot of TBAF in DMF ( $46 \times 10^{-4}$ M) followed by 20 $\mu$ L aliquot of water, (b) 20 $\mu$ L aliquot of TBAI in DMF ( $46 \times 10^{-4}$ M) followed by 20 $\mu$ L aliquot of water.                                 |
| Figure S26. | Determination of magnetic moment of (a) <i>CisCoNalurea</i> and (b) <i>TransCoNalurea</i> .                                                                                                                                                                                                                                              |
| Table S4    | List of torsion angles of two symmetry independent <b>L</b> .                                                                                                                                                                                                                                                                            |
| Table S5    | Optical rotation and specific rotation of <i>CisCoNalurea</i> in THF-DMF (2:1 v/v) at                                                                                                                                                                                                                                                    |

---

---

|            |                                                                                                                                   |
|------------|-----------------------------------------------------------------------------------------------------------------------------------|
|            | different concentrations at 25 °C.                                                                                                |
| Table S6   | Optical rotation and specific rotation of <i>CisCoNalurea</i> in methanol-acetone (1:3 v/v) at different concentrations at 25 °C. |
| Table S7   | Optical rotation and specific rotation of <i>CisCoNalurea</i> in DCM-acetone (1:3 v/v) at different concentrations at 25 °C.      |
| Table S8   | Optical rotation and specific rotation of <i>CisCoNalurea</i> in DMF at different concentrations at 20 °C.                        |
| Table S9   | Z-average values of <i>CisCoNalurea</i> in different solvent mixtures at different concentrations.                                |
| Table S10  | Z-average values of <i>CisCoNalurea</i> from dynamic light scattering in DMF at different concentrations.                         |
| Table S11  | Coordinates of the optimized structure of L.                                                                                      |
| Table S12  | Coordinates of the optimized structure of <i>CisCoNalurea</i> .                                                                   |
| Table S13. | Coordinates of the optimized structure of <i>TransCoNalurea</i> .                                                                 |

---

## General:

### Certain details on the crystal structure determination:

For CCDC no. 2265811 (*CisCoNalurea*), we used a solvent mask in Olex 2 (version 1.5) to reduce the effect of residual electron densities of the highly disordered solvent molecules of 0.5 DMF and one H<sub>2</sub>O. 260 electrons were found in a volume of 1212 Å<sup>3</sup> in one void per unit cell.

CCDC no. 2265812 (*TransCoNalurea*) has one DMF molecule with disordered O5, C26, and C27 atoms. Attempts were made to use SPLIT SAME for these disordered atoms, but this resulted in a wR<sub>2</sub> value of 19.10% and an increase of shift from 0.000 to 6.476. So, we have not corrected the disordered DMF molecule. This disordered DMF molecule affected the wR<sub>2</sub> value by 21.69%. We have also used a solvent mask in Olex 2 (version 1.5) to reduce the effect of residual electron densities of the highly disordered solvent molecules of one DMF and two H<sub>2</sub>O. 444 electrons were found in a volume of 1586 Å<sup>3</sup> in one void per unit cell.

**Magnetic moment measurement of complexes *CisCoNalurea* and *TransCoNalurea* (in solid state):**

The magnetic susceptibility ( $\chi_M$ ) of the bulk solid samples of both *CisCoNalurea* and *TransCoNalurea* were measured (at a temperature of 18°C  $\approx$  291.15K) in Sherwood Scientific magnetic susceptibility balance. Diamagnetic correction factors ( $\chi_D$ ) were calculated for both these complexes.<sup>1</sup> The respective magnetic moments ( $\mu_{eff}$ ) were finally calculated by using the formula,

$$\mu_{eff} = \sqrt{\frac{3k_B}{N_A \beta^2} (\chi_M - \chi_D) T}$$

**Magnetic moment of *CisCoNalurea*, and *TransCoNalurea* in solution (Evans method):**

The magnetic moments of both *CisCoNalurea* and *TransCoNalurea* [in CD<sub>3</sub>OD-(CD<sub>3</sub>)<sub>2</sub>CO (1:3 v/v) binary solvent] were determined by Evans method. A solution of *CisCoNalurea* (0.0010 g, 2.88 mM) [or, *TransCoNalurea* (0.0013 g, 2.88 mM)] in a 0.4 mL mixture of MeOH-d<sub>4</sub>/Acetone-d<sub>6</sub> (1:3 v/v) and tert-butyl alcohol [2% in MeOH-d<sub>4</sub>/Acetone-d<sub>6</sub> (1:3 v/v) mixture] was placed in an NMR tube. To the same NMR tube, a capillary containing 2% tert-butyl alcohol in MeOH-d<sub>4</sub>/Acetone-d<sub>6</sub> (1:3 v/v) mixture was inserted. The NMR spectra were recorded in Bruker ASCEND 600 Nuclear Magnetic Resonance Spectrometer at 600 MHz at 25°C. A chemical shift difference of 12 Hz (for *CisCoNalurea*) and 6 Hz (for *TransCoNalurea*) for tert-butyl alcohol present in the inner and outer tubes were observed respectively. The magnetic moment of the respective samples was calculated by equation S2:

$$\chi_M = \frac{3 \times \Delta\nu}{1000 \times \nu \times c} \dots\dots\dots(\text{equation S1})$$

where,  $\Delta\nu$  = paramagnetic shift of tert-butyl alcohol in Hz

c = molar concentration of *CisCoNalurea* or *TransCoNalurea*

$\nu$  = frequency of NMR instrument in Hz

$$\mu_{eff} = 798 \times \sqrt{(\chi_M \times T)} \dots\dots\dots(\text{equation S2})$$

where, T = 25°C = 298.15 K

Table S1. Crystallographic and refinement parameters of the ligand **L**, **CisCoNalurea**, and **TransCoNalurea**.

| Parameters                           | L                                                  | <i>CisCoNalurea</i>                                                              | <i>TransCoNalurea</i>                                                             |
|--------------------------------------|----------------------------------------------------|----------------------------------------------------------------------------------|-----------------------------------------------------------------------------------|
| <i>Formula</i>                       | C <sub>13</sub> H <sub>12</sub> ClN <sub>3</sub> O | C <sub>50</sub> H <sub>46</sub> Cl <sub>2</sub> CoN <sub>10</sub> O <sub>8</sub> | C <sub>56</sub> H <sub>60</sub> Cl <sub>2</sub> CoN <sub>12</sub> O <sub>10</sub> |
| <i>CCDC</i>                          | 2265810                                            | 2265811                                                                          | 2265812                                                                           |
| <i>Mol. wt.</i>                      | 261.71                                             | 1044.80                                                                          | 1190.99                                                                           |
| <i>Crystal system, Space group</i>   | Monoclinic, <i>Pn</i>                              | Monoclinic, <i>C2/c</i>                                                          | Monoclinic, <i>C2/c</i>                                                           |
| <i>a</i> (Å)                         | 16.854(8)                                          | 13.3053(15)                                                                      | 19.691(4)                                                                         |
| <i>b</i> (Å)                         | 4.578(2)                                           | 20.015(2)                                                                        | 19.736(4)                                                                         |
| <i>c</i> (Å)                         | 18.262(9)                                          | 21.155(2)                                                                        | 18.462(4)                                                                         |
| <i>α</i> (°)                         | 90                                                 | 90                                                                               | 90                                                                                |
| <i>β</i> (°)                         | 112.507(13)                                        | 90.540(3)                                                                        | 107.852(6)                                                                        |
| <i>γ</i> (°)                         | 90                                                 | 90                                                                               | 90                                                                                |
| <i>V</i> (Å <sup>3</sup> )           | 1301.8(11)                                         | 5633.4(11)                                                                       | 6829(3)                                                                           |
| <i>Density, g cm<sup>-3</sup></i>    | 1.335                                              | 1.232                                                                            | 1.158                                                                             |
| <i>Abs. coeff., mm<sup>-1</sup></i>  | 0.285                                              | 0.456                                                                            | 0.387                                                                             |
| <i>F</i> (000)                       | 544                                                | 2164                                                                             | 2484                                                                              |
| <i>Total no. of reflections</i>      | 4565                                               | 4963                                                                             | 6011                                                                              |
| <i>Reflections, I &gt; 2σ(I)</i>     | 3957                                               | 3622                                                                             | 4589                                                                              |
| <i>Max θ/°</i>                       | 24.998                                             | 25.000                                                                           | 24.999                                                                            |
| <i>Ranges (h, k, l)</i>              | -20 ≤ h ≤ 20<br>-5 ≤ k ≤ 5<br>-21 ≤ l ≤ 21         | -15 ≤ h ≤ 15<br>-23 ≤ k ≤ 23<br>-25 ≤ l ≤ 25                                     | -23 ≤ h ≤ 23<br>-23 ≤ k ≤ 23<br>-21 ≤ l ≤ 21                                      |
| <i>Completed to 2θ (%)</i>           | 99.1                                               | 99.9                                                                             | 99.7                                                                              |
| <i>Data/restraints/parameters</i>    | 4565/2/334                                         | 4963/0/323                                                                       | 6011/0/371                                                                        |
| <i>Goof (F<sup>2</sup>)</i>          | 1.051                                              | 1.131                                                                            | 1.123                                                                             |
| <i>R indices [I &gt; 2σ(I)]</i>      | 0.0339                                             | 0.0561                                                                           | 0.0636                                                                            |
| <i>wR<sub>2</sub> [I &gt; 2σ(I)]</i> | 0.0733                                             | 0.1499                                                                           | 0.1778                                                                            |
| <i>R indices (all data)</i>          | 0.0433                                             | 0.0825                                                                           | 0.0841                                                                            |
| <i>wR<sub>2</sub> (all data)</i>     | 0.0793                                             | 0.1897                                                                           | 0.2169                                                                            |

Table S2. Metal-ligand bond lengths of **CisCoNalurea**, and **TransCoNalurea** compared with the bond lengths of the optimized structure.

| Complex               | Bond-length (Å)  |                   |                  |
|-----------------------|------------------|-------------------|------------------|
|                       | Co1-N3           | Co1-O2            | Co1-O3           |
| <b>CisCoNalurea</b>   | 2.141<br>(1.944) | 2.041<br>(2.2494) | 2.119<br>(1.936) |
| <b>TransCoNalurea</b> | 2.217<br>(1.968) | 2.057<br>(2.175)  | 2.047<br>(1.947) |

@ Bond lengths given inside the brackets are from the respective theoretically optimized structure given in Fig.

S2 (calculation was done Gaussian 09W at B3LYP/6-31G level.

Table S3. Hydrogen bond parameters of **L**, *CisCoNalurea*, and *TransCoNalurea*.

| Compound              | D-H...A                              | $d_{D-H}$ (Å) | $d_{H...A}$ (Å) | $d_{D...A}$ (Å) | $\angle D-H...A$ (°) |
|-----------------------|--------------------------------------|---------------|-----------------|-----------------|----------------------|
| <b>L</b>              | N(1)-H(1) ... O(1) [x, -1+y, z]      | 0.86          | 2.08            | 2.864(3)        | 152                  |
|                       | N(2)-H(2) ... O(1) [x, -1+y, z]      | 0.86          | 2.10            | 2.874(4)        | 149                  |
|                       | N(4)-H(4) ... O(2) [x, 1+y, z]       | 0.83(4)       | 2.13(4)         | 2.883(4)        | 152(3)               |
|                       | N(5)-H(5A) ... O(2) [x, 1+y, z]      | 0.86 (4)      | 2.05(4)         | 2.848(4)        | 153(3)               |
| <i>CisCoNalurea</i>   | N(1)-H(1) ... O(3) [1/2+x, 1/2+y, z] | 0.86          | 2.16            | 3.001(4)        | 164                  |
|                       | N(2)-H(2) ... O(4) [1/2+x, 1/2+y, z] | 0.86          | 2.00            | 2.807(5)        | 156                  |
| <i>TransCoNalurea</i> | N(1)-H(1) ... O(4) [1-x, y, 1/2-z]   | 0.86          | 2.12            | 2.882(5)        | 147                  |
|                       | N(2)-H(2) ... O(3) [1-x, y, 1/2-z]   | 0.86          | 2.12            | 2.945(4)        | 160                  |

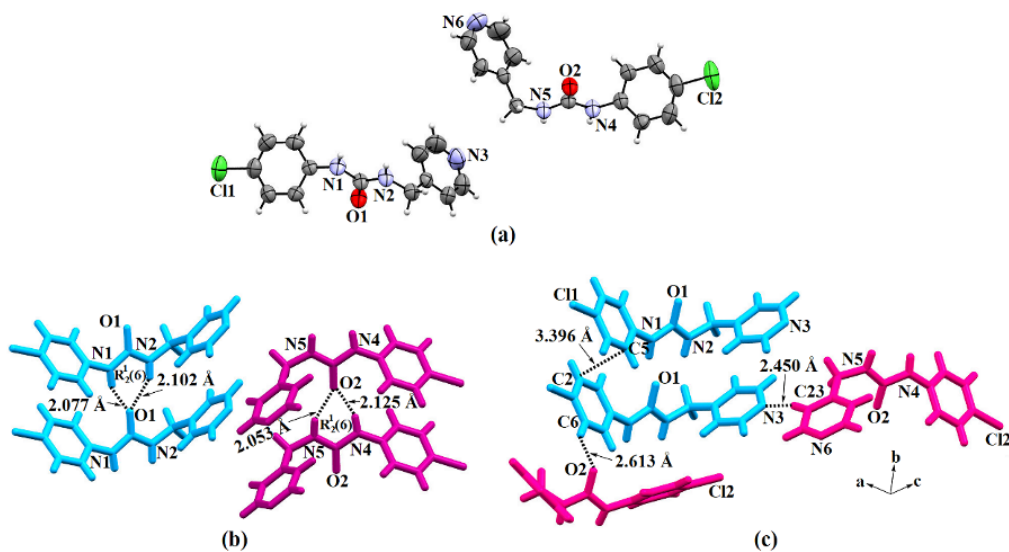

Figure S1. (a) Crystal structure of **L** determined by X-ray single crystal diffraction (Thermal ellipsoids are drawn at 50% probability); (b) Hydrogen bonds in symmetry non-equivalent molecules; and (c)  $\pi$ -interactions, C-H...O and C-H...N interactions in the crystal lattice.

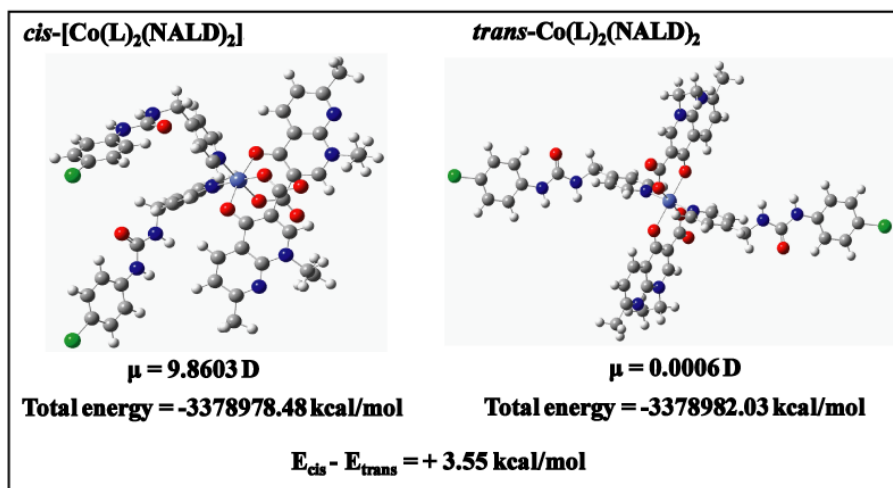

Figure S2. Optimized structures of *CisCoNalurea*, and *TransCoNalurea* with their calculated dipole moments. (DFT calculation was done with B3LYP functional using 6-31G as the basis set).

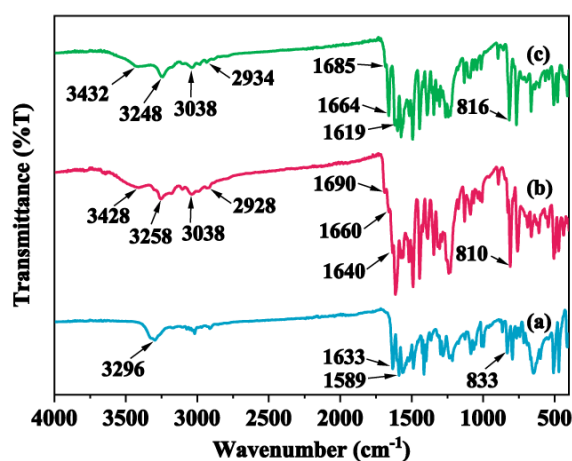

Figure S3. FTIR spectra of the solid samples of (a) L, (b) *CisCoNalurea*, and (c) *TransCoNalurea*.

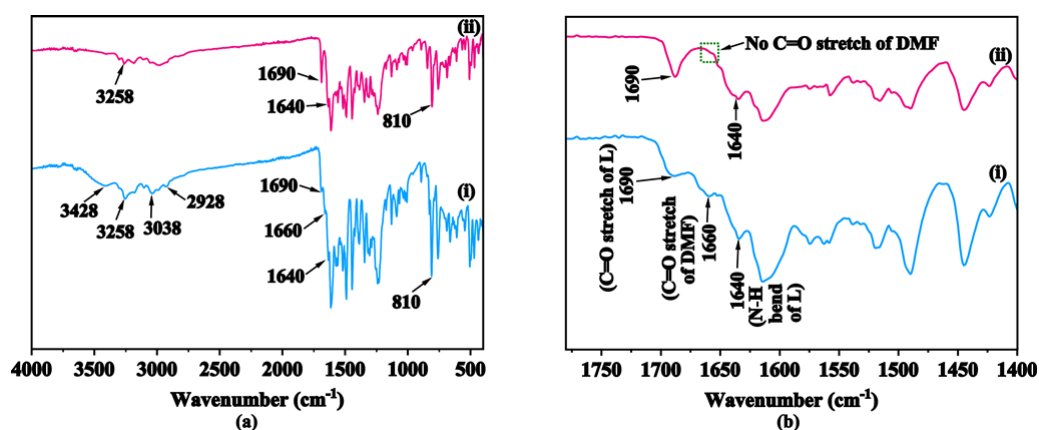

Figure S4. FTIR spectra of a solid sample of *CisCoNalurea* (a) (i) as synthesized, (ii) after heating at 180°C for seven days, (b) expansion in the region 1780-1400 cm<sup>-1</sup>.

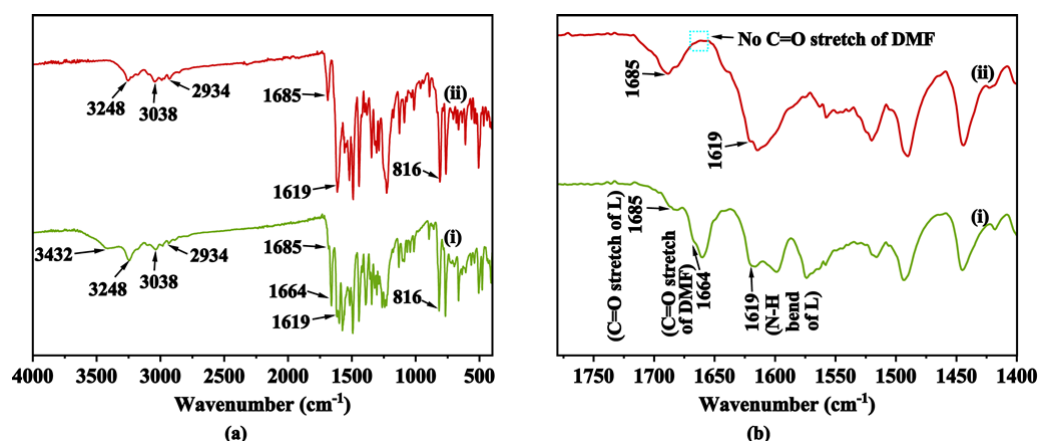

Figure S5. FTIR spectra of a solid sample of *TransCoNalurea* (a) (i) as synthesized, (ii) after heating in a laboratory oven at 110°C for 14 days, (b) expansion in the region 1780-1400 cm<sup>-1</sup>.

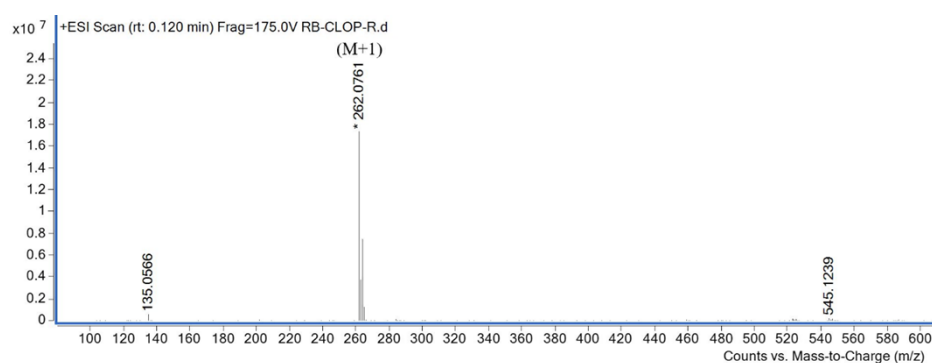

Figure S6. ESI-Mass spectrum of L.

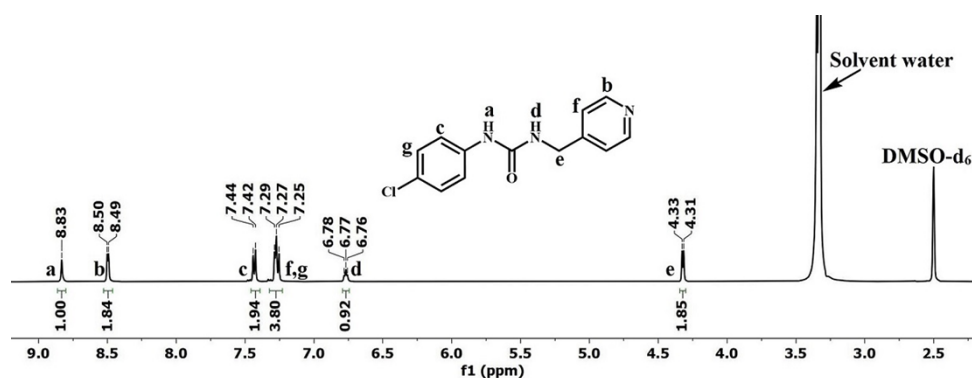

Figure S7. <sup>1</sup>H-NMR (DMSO-d<sub>6</sub>, 500 MHz) spectrum of L.



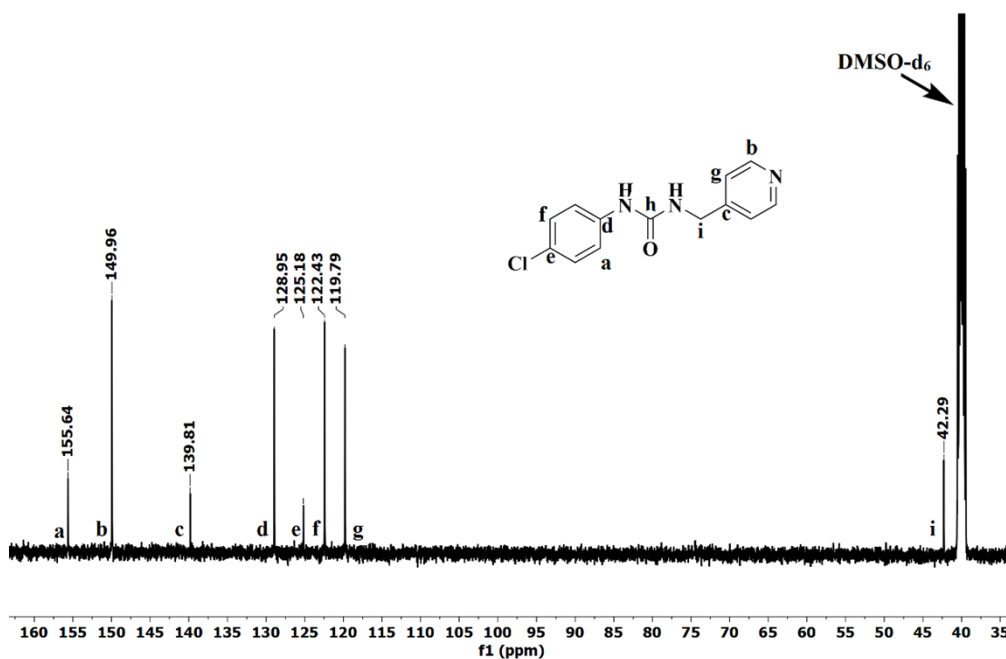

Figure S8.  $^{13}\text{C}$ -NMR (DMSO- $d_6$ , 125 MHz) spectrum of L.

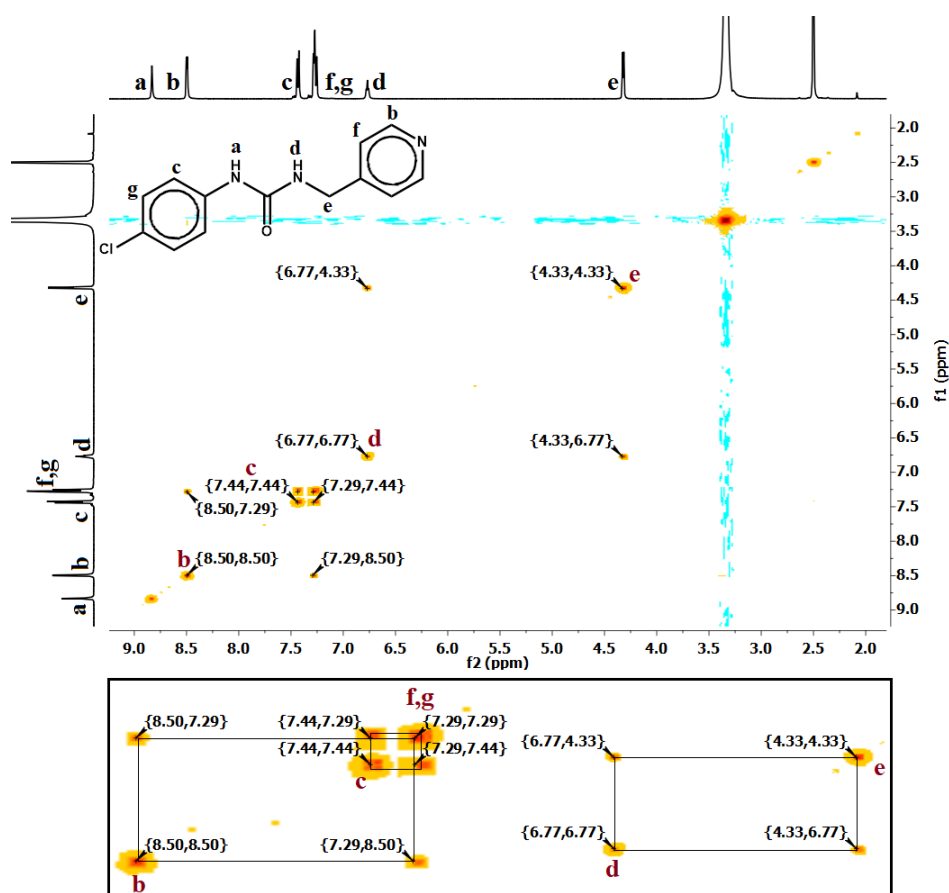

Figure S9.  $^1\text{H}$ -HOMOCOSY (DMSO- $d_6$ , 500 MHz) spectrum of L (the coupling correlations are explained at the bottom).

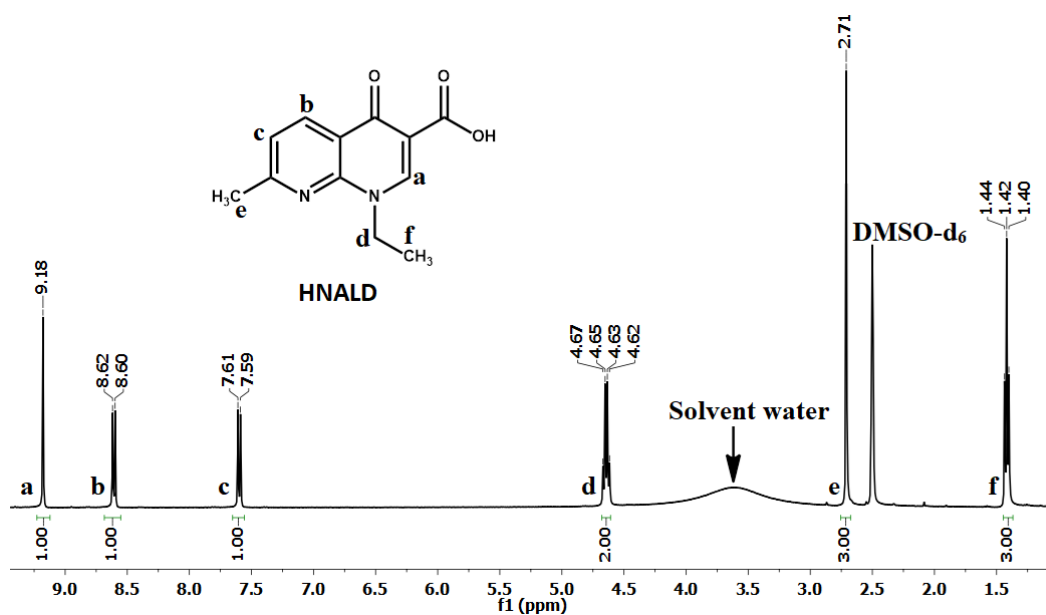

Figure S10. <sup>1</sup>H-NMR (DMSO-d<sub>6</sub>, 400 MHz) spectrum of HNALD.

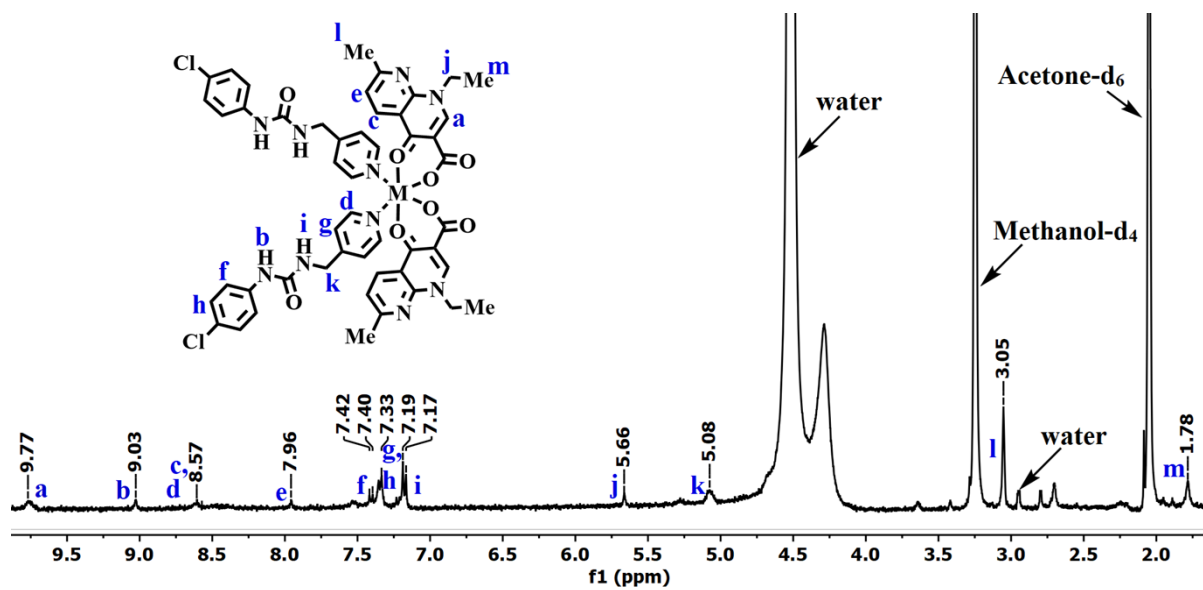

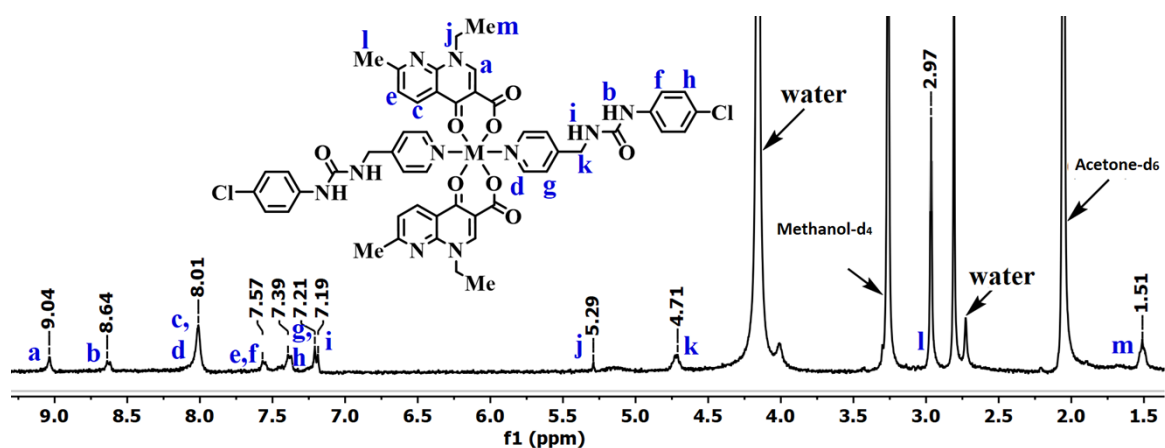

Figure S12.  $^1\text{H-NMR}$  {Methanol- $\text{d}_4$ /acetone- $\text{d}_6$  (1:3 v/v), 400MHz} spectrum of *TransCoNalurea*.

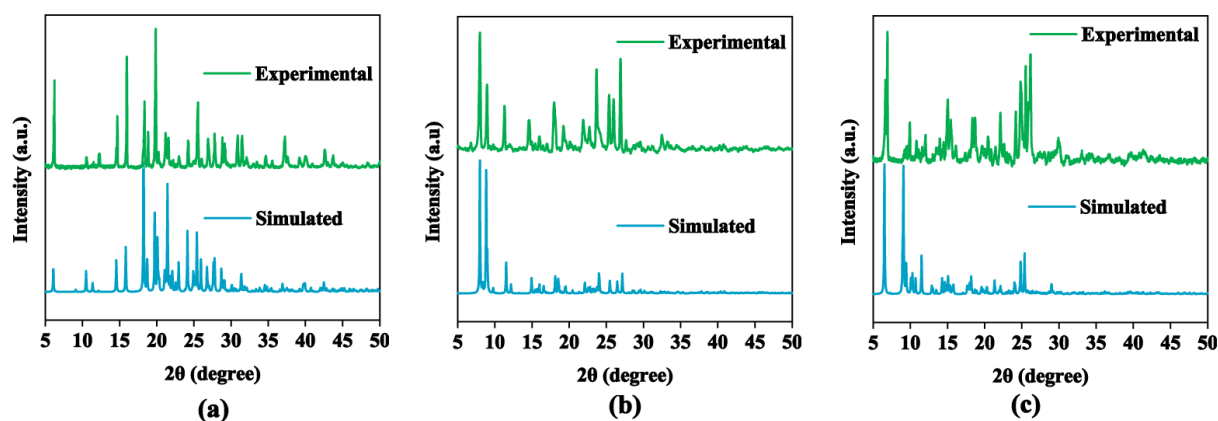

Figure S13. Powder X-ray diffraction pattern of (a) **L**, (b) *CisCoNalurea*, and (c) *TransCoNalurea*.

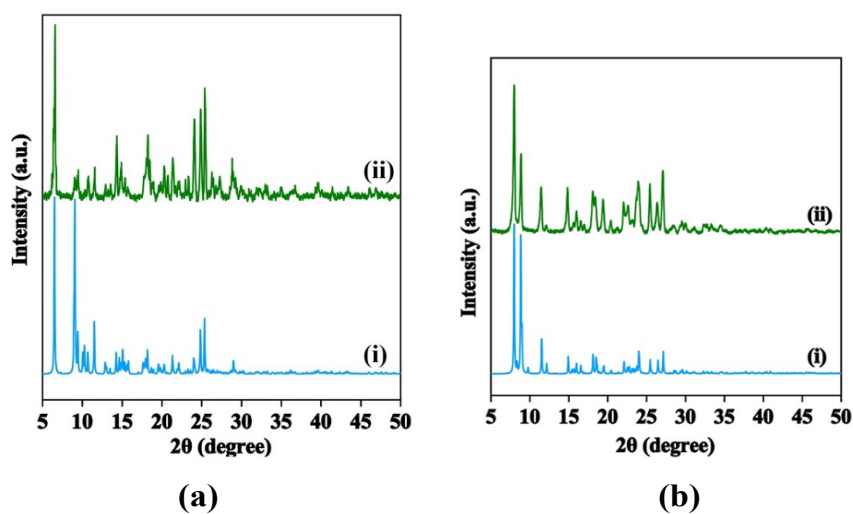

Figure S14. Powder X-ray diffraction patterns of the solid samples obtained from the heating reaction of **L**, **HNALD**, and  $\text{Co}(\text{NO}_3)_2 \cdot 6\text{H}_2\text{O}$  at  $80^\circ\text{C}$  for (a) one hour giving

*TransCoNalurea*, and (b) two hours giving *CisCoNalurea* {(i) simulated and (ii) experimental patterns}.

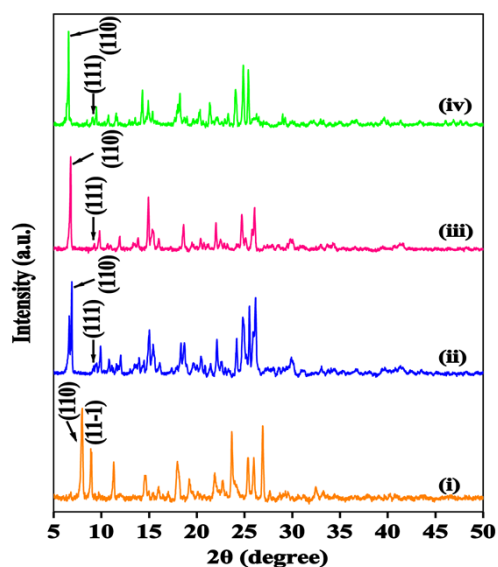

Figure S15. Comparison of the powder X-ray diffraction patterns of (i) *CisCoNalurea*; (ii) *TransCoNalurea*; (iii) and (iv) are the powder X-ray patterns of the products formed by using TBACl and TBABr salts for *cis*-to-*trans*-isomer conversion respectively.

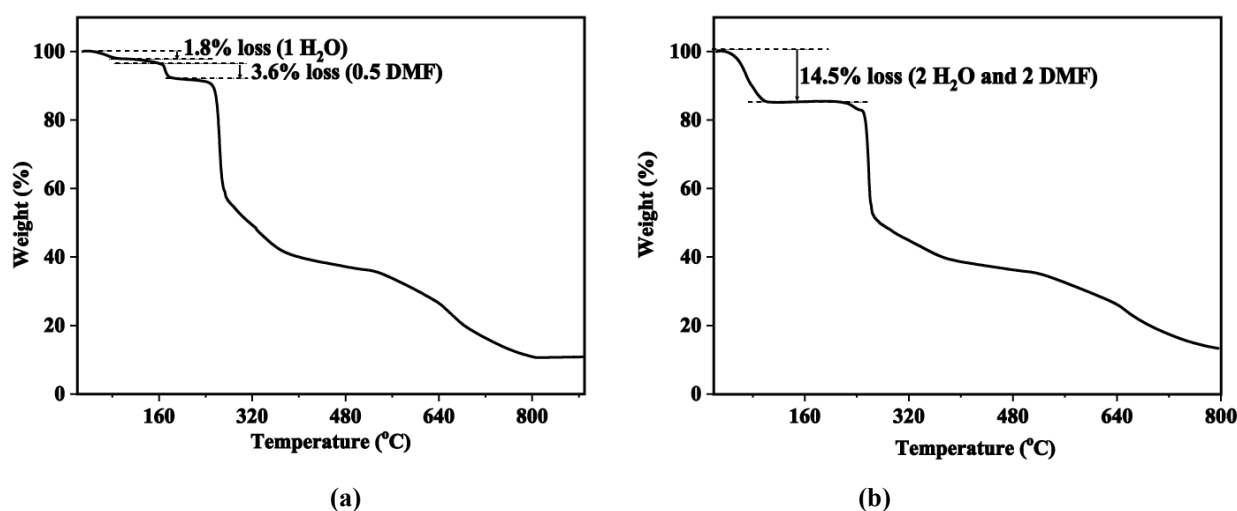

Figure S16. The plot of weight vs temperature observed from thermogravimetry of (a) *CisCoNalurea*, and (b) *TransCoNalurea*.

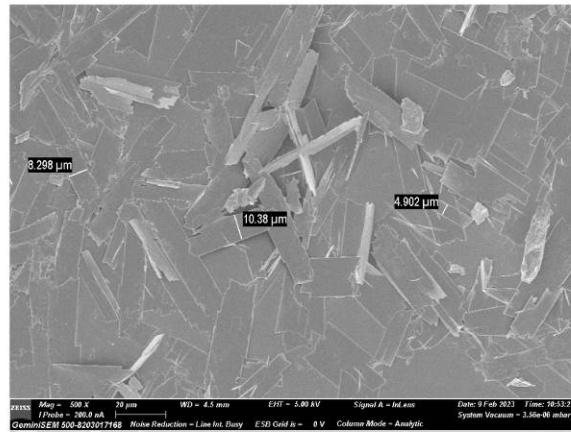

(a)

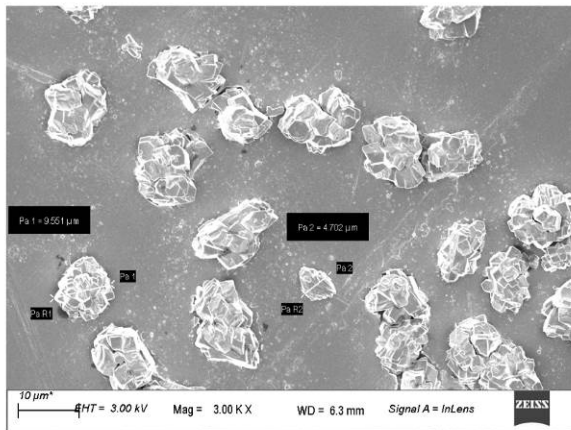

(b)

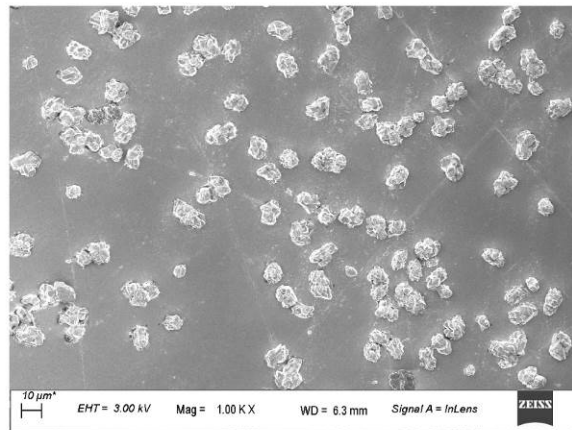

(c)

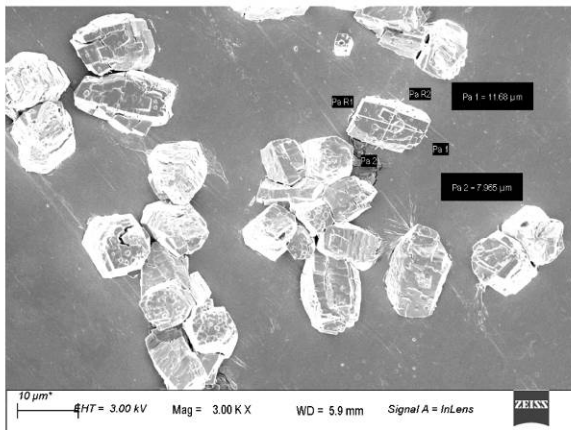

(d)

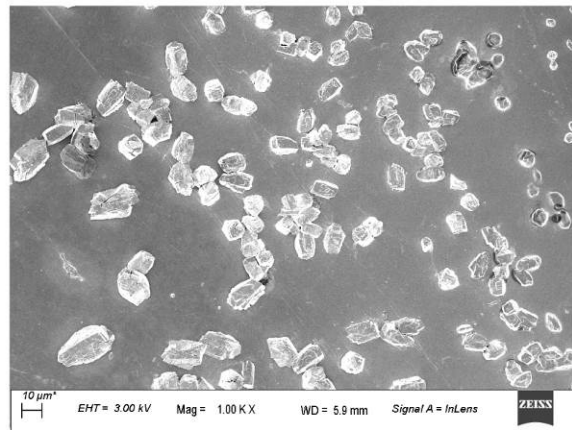

(e)

Figure S17. FESEM images of (a) **L**; (b) and (c) **CisCoNalurea** (at two magnifications); (d) and (e) **TransCoNalurea** (at two magnifications).

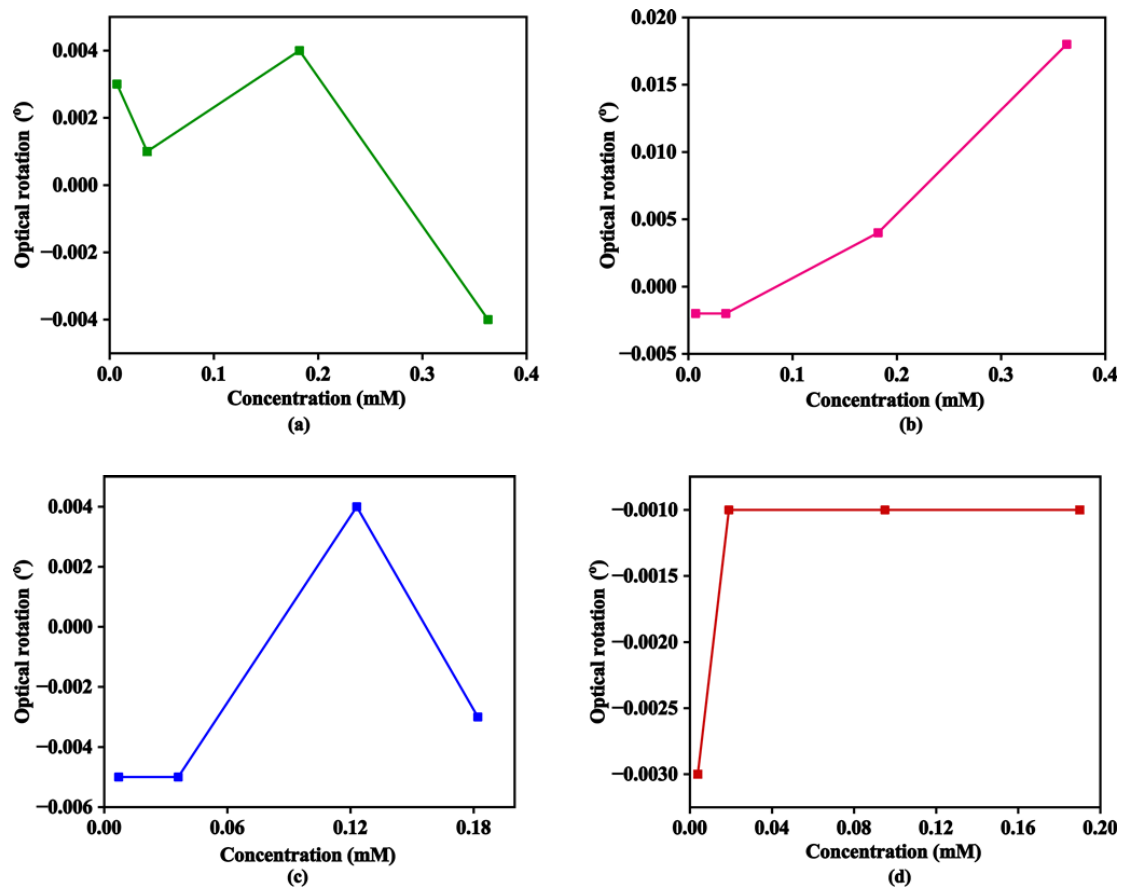

Figure S18. Optical rotation versus concentration plot of *CisCoNalurea* in binary solvents (a) THF-DMF (2:2 v/v), (b) DCM-acetone (1:3 v/v), (c) methanol-acetone (1:3 v/v), and (d) DMF.

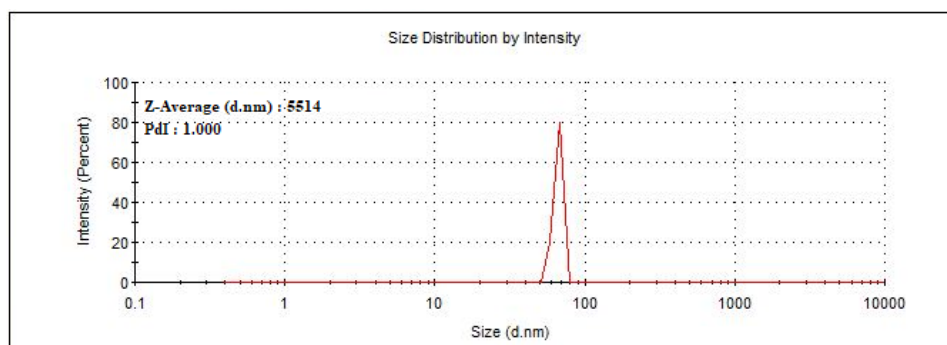

(a)

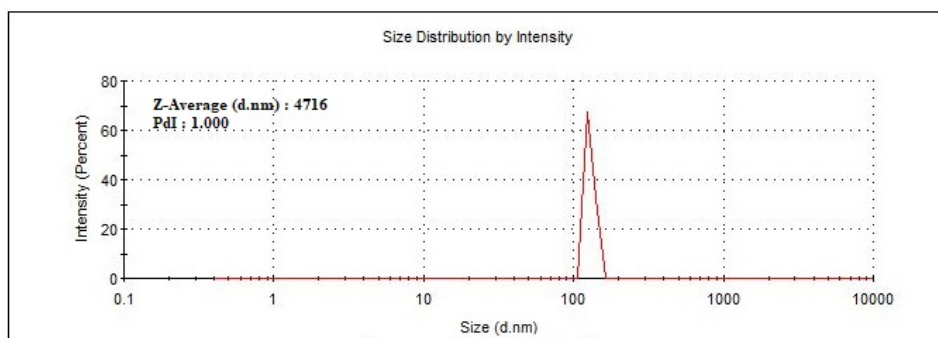

(b)

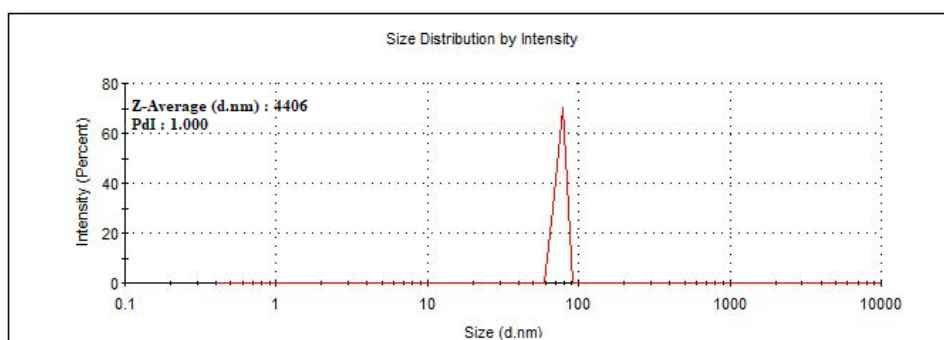

(c)

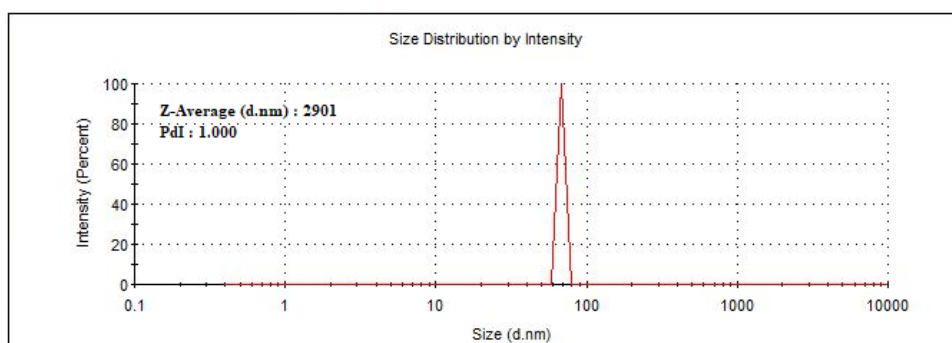

(d)

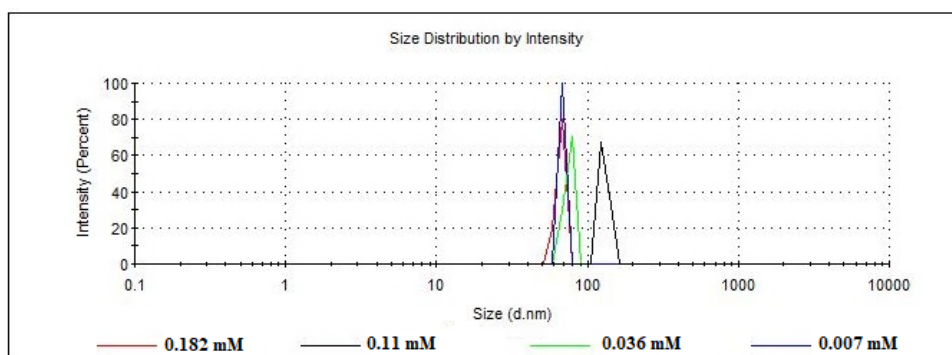

(e)

Figure S19. Size distribution plot of *CisCoNaturea* in THF-DMF (2:1 v/v) mixture at different concentrations (a) 0.182 mM, (b) 0.11 mM, (c) 0.036 mM, (d) 0.007 mM, and (e) comparative size distribution plot of these three concentrations (obtained from DLS data).

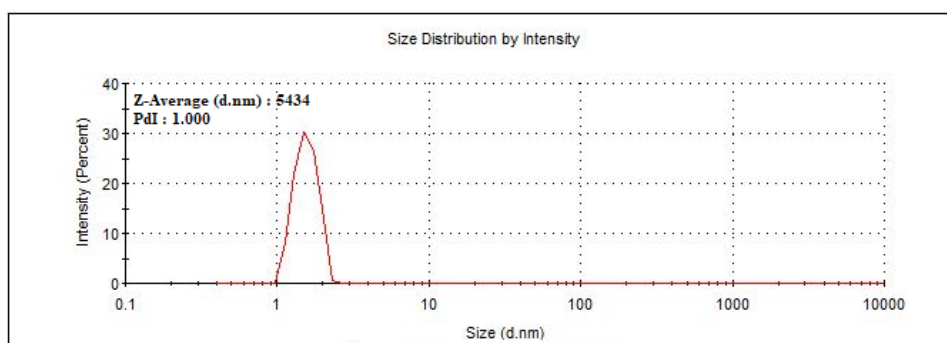

(a)

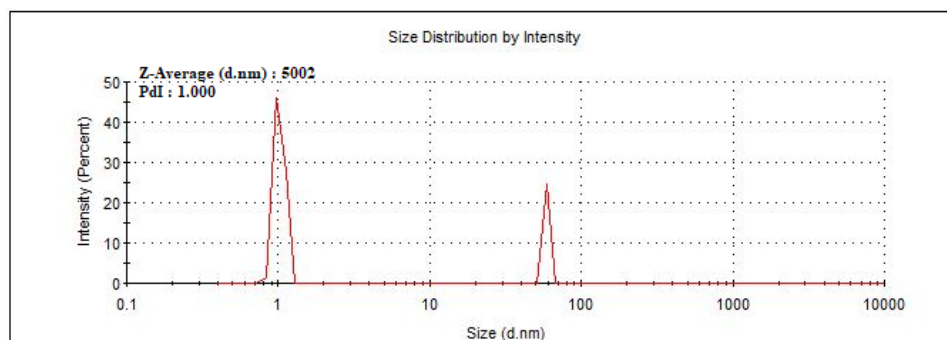

(b)

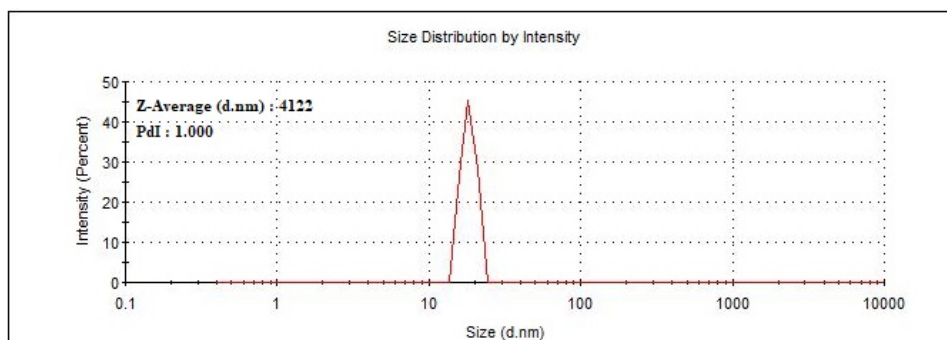

(c)



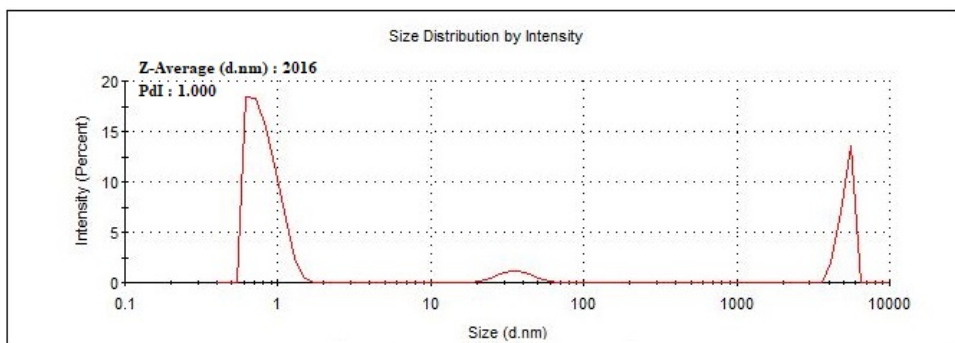

(d)

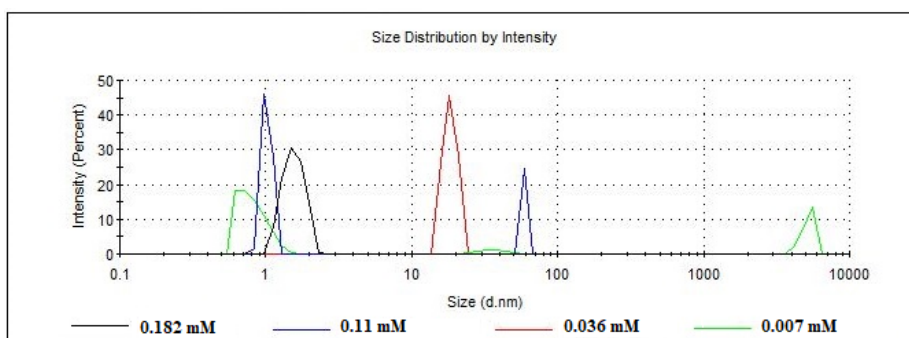

(e)

Figure S20. Size distribution plot of *CisCoNalurea* in methanol-acetone (1:3 v/v) mixture at different concentrations (a) 0.182 mM, (b) 0.11 mM, (c) 0.036 mM, (d) 0.007 mM, and (e) comparative size distribution plot of these three concentrations from dynamic light scattering.

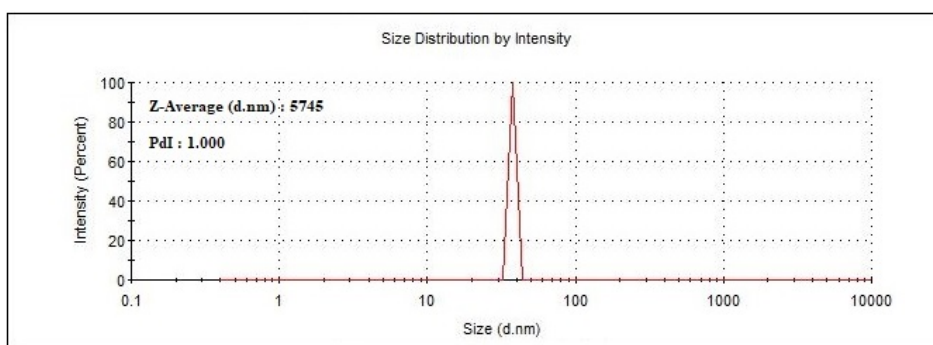

(a)

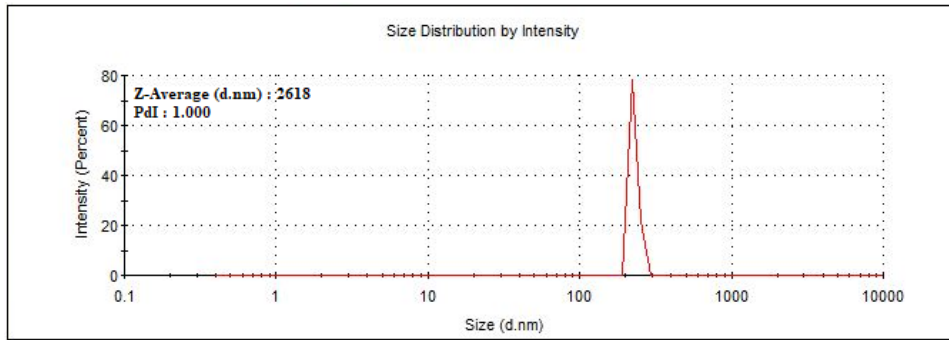

(b)

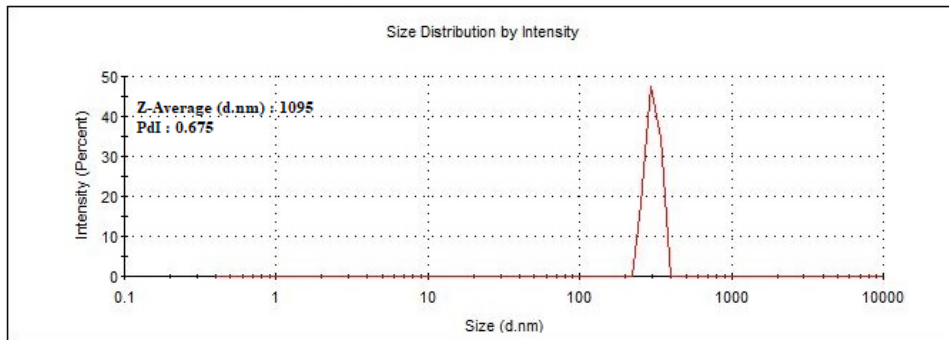

(c)

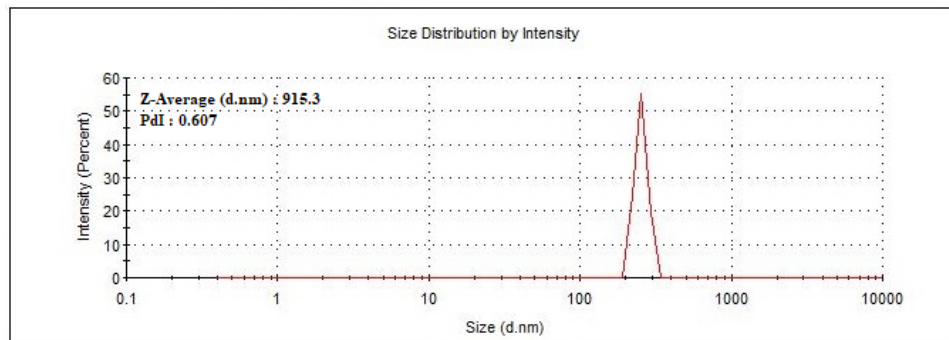

(d)

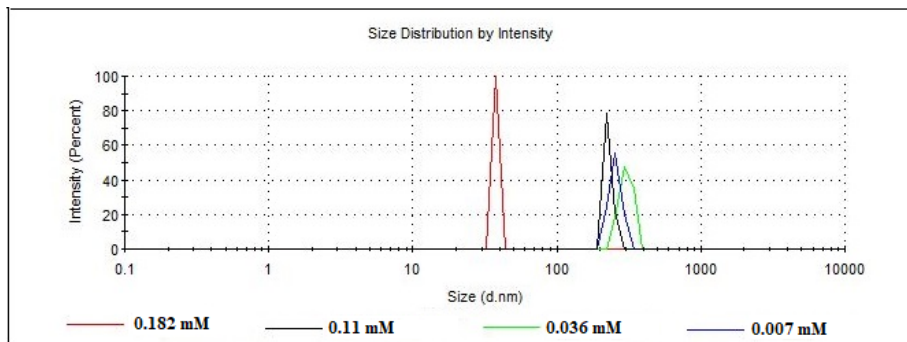

(e)

Figure S21. Size distribution plot of *CisCoNalurea* in DCM-acetone (1:3 v/v) mixture at different concentrations (a) 0.182 mM, (b) 0.11 mM, (c) 0.036 mM, (d) 0.007 mM and (e) comparative size distribution plot of these three concentrations from dynamic light scattering.

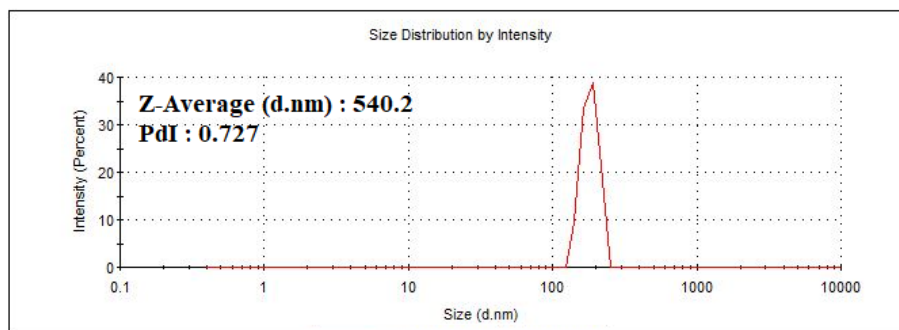

(a)

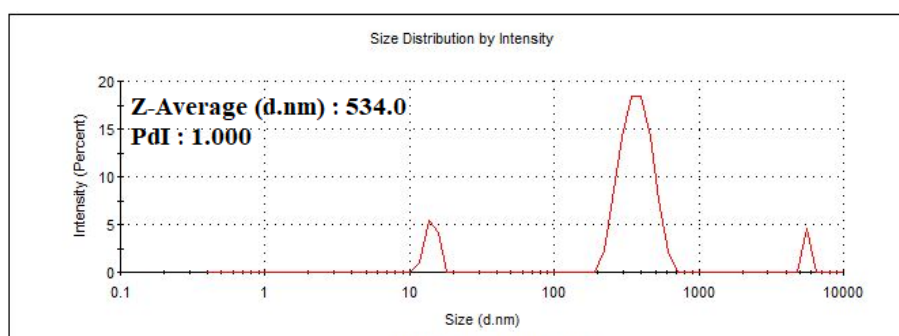

(b)

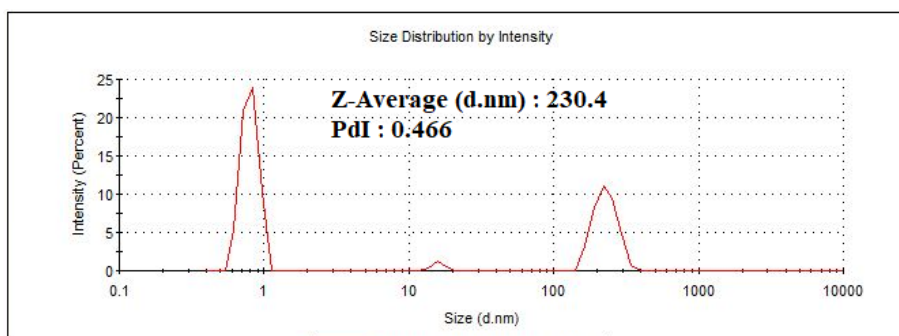

(c)

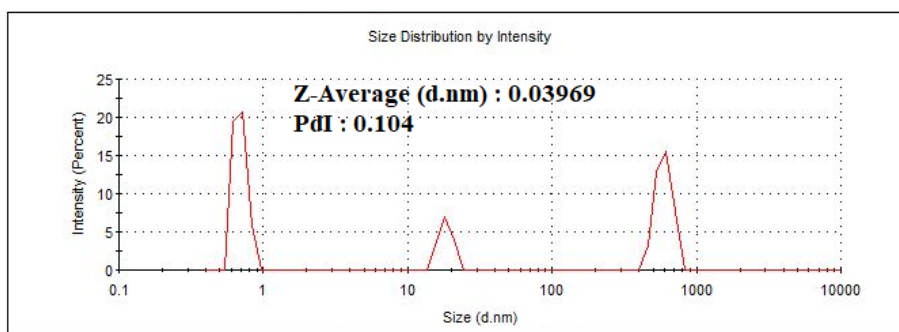

(d)

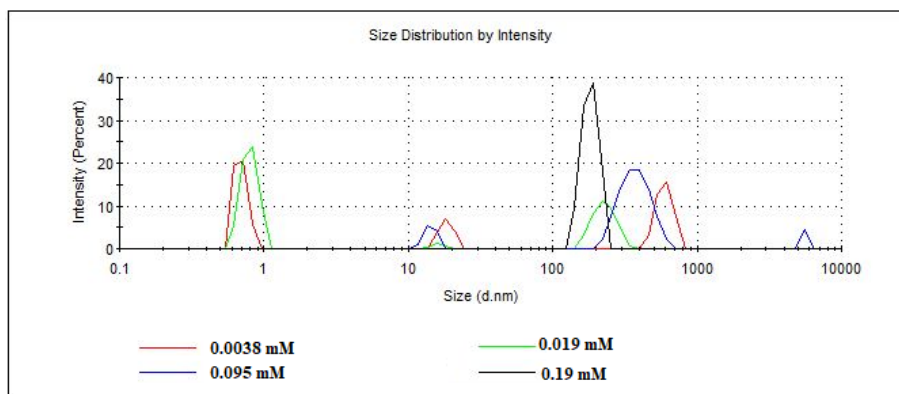

(e)

Figure S22. Size distribution plot of *CisCoNalurea* in DMF at different concentrations (a) 0.182 mM, (b) 0.11 mM, (c) 0.036 mM, (d) 0.007 mM, and (e) comparative size distribution plot of these three concentrations from dynamic light scattering.

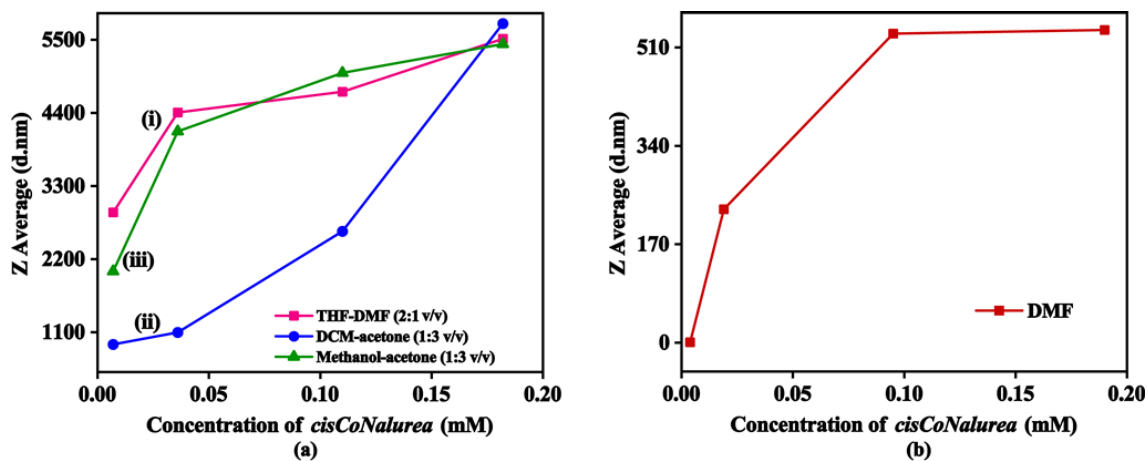

Figure S23. Plots of average particle size ( $Z_{av}$ ) versus concentration of *CisCoNalurea* at different concentrations (a) (i) THF-DMF (2:1 v/v), (ii) DCM-acetone (1:3 v/v), (iii) methanol-acetone (1:3 v/v), and (b) DMF.

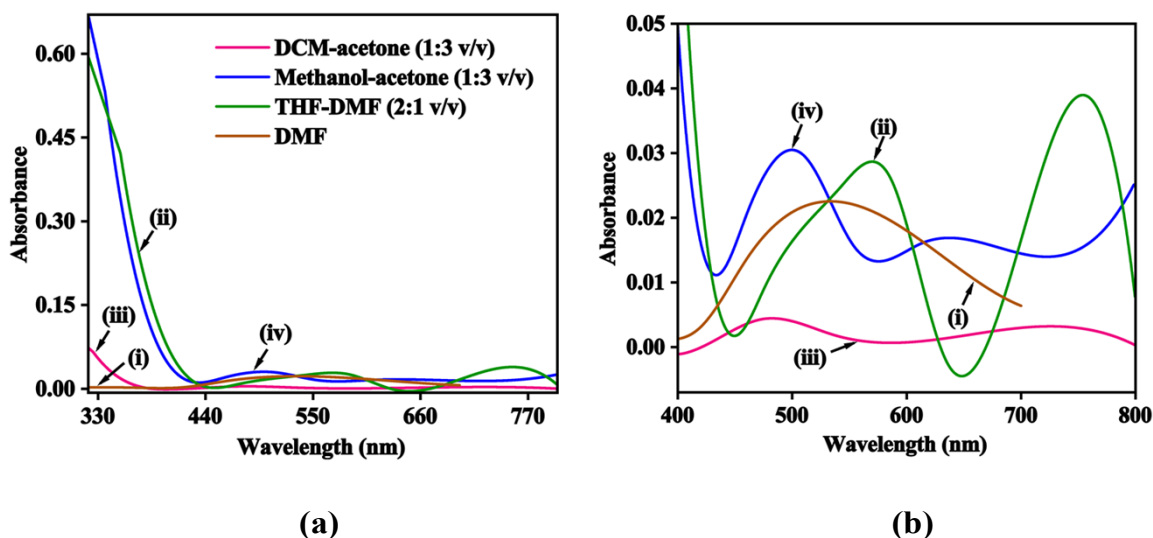

Figure S24. UV-visible spectra, and (b) visible spectra of *CisCoNalurea* in (a) DMF ( $1.14 \times 10^{-3}$  M), and in binary solvents (b) THF-DMF (2:2 v/v), (c) DCM-acetone (1:3 v/v), and (d) methanol-acetone (1:3 v/v); concentration of *CisCoNalurea* in binary solvents =  $1.5 \times 10^{-2}$  M (cuvette used: 1mm path-length).

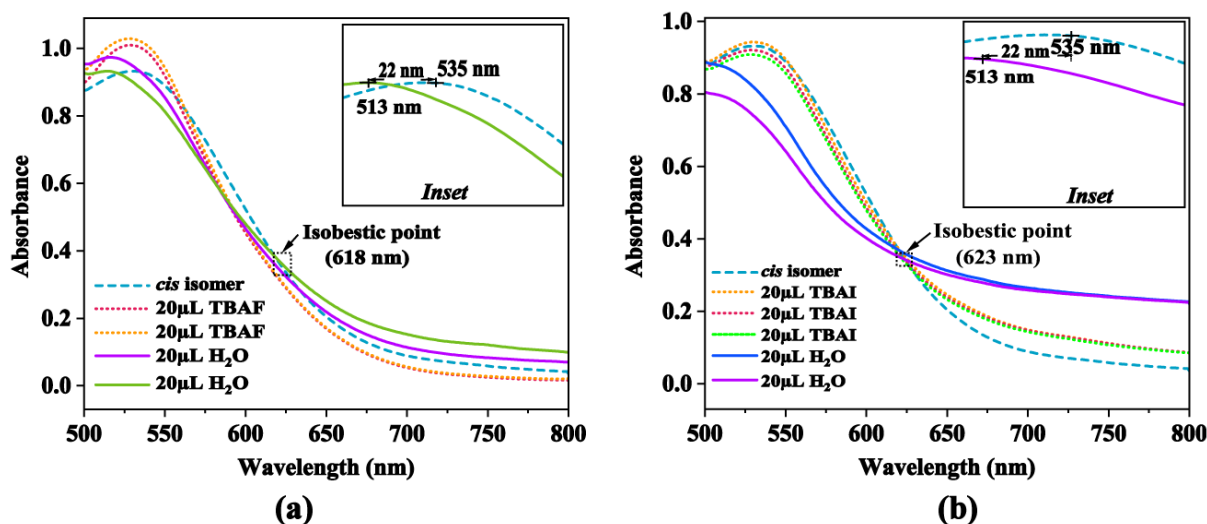

Figure S25. Visible absorption titration of *CisCoNalurea* in DMF ( $23 \times 10^{-4}$  M) with (a) 20  $\mu$ L aliquot of TBAF in DMF ( $46 \times 10^{-4}$  M) followed by 20  $\mu$ L aliquot of water, (b) 20  $\mu$ L aliquot of TBAI in DMF ( $46 \times 10^{-4}$  M) followed by 20  $\mu$ L aliquot of water.

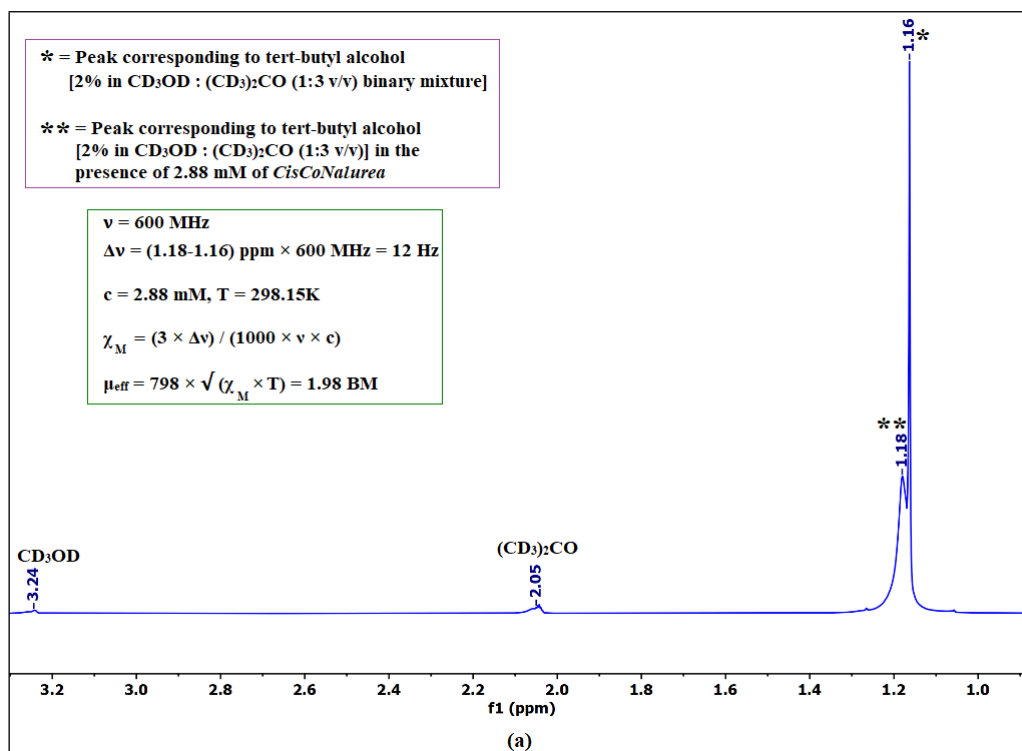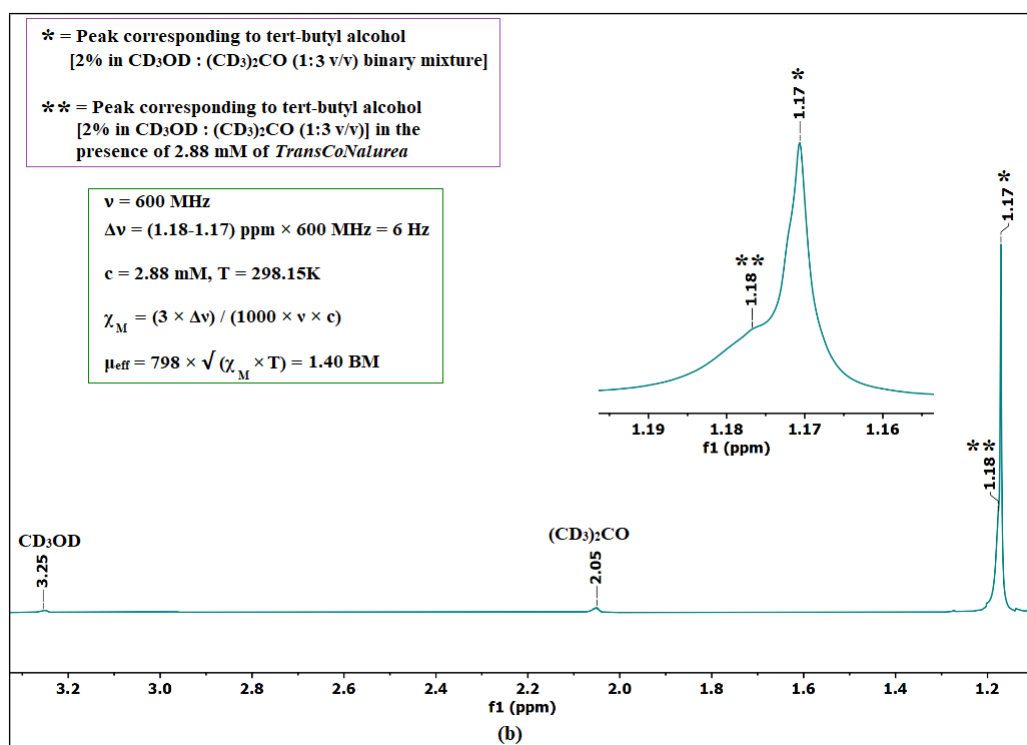

Figure S26. Determination of magnetic moment of (a) *CisCoNalurea* and (b) *TransCoNalurea*.

Table S4. List of torsion angles of two symmetry independent L.

| Torsion       | Torsion angle (°) |
|---------------|-------------------|
|               |                   |
| N1-C7-N2-C8   | -180.0(3)         |
| N4-C20-N5-C21 | 175.8(3)          |
| C4-N1-C7-O1   | -0.8(5)           |
| C17-N4-C20-O2 | -0.8(5)           |
| C4-N1-C7-N2   | 178.8(3)          |
| C17-N4-C20-N5 | 179.8(3)          |

Table S5. Optical rotation and specific rotation of *CisCoNalurea* in THF-DMF (2:1 v/v) at different concentrations at 25 °C.

| Concentration (mM) | Optical rotation (°) | Specific rotation (°) |
|--------------------|----------------------|-----------------------|
| 0.363              | -0.004               | -10.0                 |
| 0.182              | 0.004                | 20.0                  |
| 0.036              | 0.001                | 25.0                  |
| 0.007              | 0.003                | 375.0                 |

Table S6. Optical rotation and specific rotation of *CisCoNalurea* in methanol-acetone (1:3 v/v) at different concentrations at 25 °C.

| Concentration (mM) | Optical rotation (°) | Specific rotation (°) |
|--------------------|----------------------|-----------------------|
| 0.182              | -0.003               | -15.0                 |
| 0.123              | 0.004                | + 29.6                |
| 0.036              | -0.005               | -125.0                |
| 0.007              | -0.005               | -625.0                |

Table S7. Optical rotation and specific rotation of *CisCoNalurea* in DCM-acetone (1:3 v/v) at different concentrations at 25 °C.

| Concentration (mM) | Optical rotation (°) | Specific rotation (°) |
|--------------------|----------------------|-----------------------|
| 0.363              | 0.018                | + 45.0                |
| 0.182              | 0.004                | 20.0                  |
| 0.036              | -0.002               | -50.0                 |
| 0.007              | -0.002               | -250.0                |

Table S8. Optical rotation and specific rotations of *CisCoNalurea* in DMF at different concentrations at 20 °C.

| Concentration (mM) | Optical rotation (°) | Specific rotation (°) |
|--------------------|----------------------|-----------------------|
| 0.190              | -0.001               | -4.7                  |
| 0.095              | -0.001               | -9.6                  |
| 0.019              | -0.001               | -47.6                 |
| 0.0038             | -0.003               | -714.3                |

Table S9. Z-average values of *CisCoNalurea* in different solvent mixtures at different concentrations.

| Solvent mixture            | Z-average value (nm) at different concentration (mM) |         |          |          |
|----------------------------|------------------------------------------------------|---------|----------|----------|
|                            | 0.182 mM                                             | 0.11 mM | 0.036 mM | 0.007 mM |
| THF-DMF (2:1 v/v)          | 5514                                                 | 4716    | 4406     | 2901     |
| Methanol-acetone (1:3 v/v) | 5434                                                 | 5002    | 4122     | 2016     |
| DCM-acetone (1:3 v/v)      | 5745                                                 | 2618    | 1095     | 915.3    |

Table S10. Z-average values of *CisCoNalurea* from dynamic light scattering in DMF at different concentrations.

| Concentration of <i>CisCoNalurea</i> in DMF (mM) | Z-average value (nm) |
|--------------------------------------------------|----------------------|
| 0.19                                             | 540.2                |
| 0.095                                            | 534                  |
| 0.019                                            | 230.4                |
| 0.0038                                           | 0.4                  |

Table S11. Coordinates of the optimized structure of **L**.

| Center Number | Atomic Number | Atomic Type | Coordinates (Angstroms) |           |           |
|---------------|---------------|-------------|-------------------------|-----------|-----------|
|               |               |             | X                       | Y         | Z         |
| 1             | 17            | 0           | -11.507042              | -0.568516 | -2.696048 |
| 2             | 8             | 0           | -5.377584               | -2.046222 | 0.289338  |



|    |   |   |            |           |           |
|----|---|---|------------|-----------|-----------|
| 3  | 7 | 0 | -4.943042  | -1.067981 | 2.331151  |
| 4  | 1 | 0 | -5.190592  | -0.358300 | 3.005113  |
| 5  | 7 | 0 | -6.998085  | -0.707680 | 1.306067  |
| 6  | 1 | 0 | -7.228528  | -0.214085 | 2.157014  |
| 7  | 6 | 0 | -8.021881  | -0.716148 | 0.328620  |
| 8  | 6 | 0 | -1.505724  | -0.290423 | 2.775170  |
| 9  | 1 | 0 | -1.520099  | -0.521939 | 3.835956  |
| 10 | 6 | 0 | -2.490657  | -0.800194 | 1.917847  |
| 11 | 6 | 0 | -7.922291  | -1.402719 | -0.895358 |
| 12 | 1 | 0 | -7.029846  | -1.967743 | -1.118875 |
| 13 | 6 | 0 | -5.754858  | -1.319831 | 1.241315  |
| 14 | 6 | 0 | -8.981984  | -1.351721 | -1.806723 |
| 15 | 1 | 0 | -8.907523  | -1.879734 | -2.749515 |
| 16 | 7 | 0 | -0.412381  | 0.840696  | 0.941975  |
| 17 | 6 | 0 | -0.492782  | 0.519580  | 2.252479  |
| 18 | 1 | 0 | 0.282118   | 0.926611  | 2.892841  |
| 19 | 6 | 0 | -10.249182 | 0.057748  | -0.290191 |
| 20 | 1 | 0 | -11.146916 | 0.618342  | -0.060883 |
| 21 | 6 | 0 | -3.614521  | -1.681462 | 2.437785  |
| 22 | 1 | 0 | -3.655971  | -2.609438 | 1.860852  |
| 23 | 1 | 0 | -3.435069  | -1.939180 | 3.486528  |
| 24 | 6 | 0 | -9.192094  | 0.010279  | 0.619443  |
| 25 | 1 | 0 | -9.279351  | 0.545033  | 1.561672  |
| 26 | 6 | 0 | -2.408751  | -0.470145 | 0.553316  |

|    |    |   |            |           |           |
|----|----|---|------------|-----------|-----------|
| 27 | 1  | 0 | -3.146679  | -0.853062 | -0.143207 |
| 28 | 6  | 0 | -10.128443 | -0.626172 | -1.497167 |
| 29 | 6  | 0 | -1.364882  | 0.344398  | 0.114442  |
| 30 | 1  | 0 | -1.272918  | 0.614778  | -0.931687 |
| 31 | 17 | 0 | 11.161420  | -3.337905 | -0.478831 |
| 32 | 8  | 0 | 5.533954   | 0.410693  | 1.224892  |
| 33 | 7  | 0 | 6.000518   | -0.254834 | -0.963704 |
| 34 | 7  | 0 | 4.096633   | 0.987406  | -0.487091 |
| 35 | 6  | 0 | 5.232515   | 0.381194  | 0.008331  |
| 36 | 6  | 0 | 3.154954   | 1.688720  | 0.388431  |
| 37 | 1  | 0 | 3.578639   | 1.610176  | 1.395820  |
| 38 | 1  | 0 | 2.184224   | 1.179453  | 0.394210  |
| 39 | 6  | 0 | 2.955683   | 3.145109  | 0.009238  |
| 40 | 6  | 0 | 7.208797   | -0.965079 | -0.786164 |
| 41 | 7  | 0 | 2.550317   | 5.864963  | -0.640202 |
| 42 | 6  | 0 | 1.668372   | 3.704786  | 0.005512  |
| 43 | 1  | 0 | 0.808203   | 3.087997  | 0.249771  |
| 44 | 6  | 0 | 7.839171   | -1.128395 | 0.461840  |
| 45 | 1  | 0 | 7.390995   | -0.695311 | 1.343570  |
| 46 | 6  | 0 | 1.515257   | 5.055970  | -0.320545 |
| 47 | 1  | 0 | 0.531856   | 5.515211  | -0.334205 |
| 48 | 6  | 0 | 9.596007   | -2.398483 | -0.602246 |
| 49 | 6  | 0 | 4.034746   | 3.980288  | -0.322078 |
| 50 | 1  | 0 | 5.047954   | 3.592707  | -0.333469 |

|    |   |   |          |           |           |
|----|---|---|----------|-----------|-----------|
| 51 | 6 | 0 | 7.796905 | -1.531776 | -1.933599 |
| 52 | 1 | 0 | 7.319572 | -1.412336 | -2.902805 |
| 53 | 6 | 0 | 8.990531 | -2.249345 | -1.847135 |
| 54 | 1 | 0 | 9.437193 | -2.682207 | -2.733742 |
| 55 | 6 | 0 | 9.035296 | -1.848094 | 0.546338  |
| 56 | 1 | 0 | 9.521328 | -1.974173 | 1.506169  |
| 57 | 6 | 0 | 3.788908 | 5.318932  | -0.635587 |
| 58 | 1 | 0 | 4.603910 | 5.988045  | -0.892314 |
| 59 | 1 | 0 | 3.871875 | 0.937597  | -1.470133 |
| 60 | 1 | 0 | 5.667958 | -0.215132 | -1.916854 |

-----

Table S12. Coordinates of the optimized structure of *CisCoNalurea*.

-----

| Center | Atomic | Atomic | Coordinates (Angstroms) |           |           |
|--------|--------|--------|-------------------------|-----------|-----------|
| Number | Number | Type   | X                       | Y         | Z         |
| 1      | 27     | 0      | 1.876461                | 0.178647  | 0.512064  |
| 2      | 17     | 0      | -7.353460               | -8.550917 | -3.016125 |
| 3      | 8      | 0      | 2.464271                | 1.997987  | 0.182872  |
| 4      | 8      | 0      | 3.608393                | 0.151211  | 1.971041  |
| 5      | 7      | 0      | 1.339076                | -1.650314 | 0.895356  |
| 6      | 8      | 0      | 3.976179                | 3.452038  | -0.697166 |
| 7      | 8      | 0      | -1.117739               | -6.737798 | -0.469881 |
| 8      | 7      | 0      | 8.270427                | -0.732085 | 1.147921  |

|    |   |   |           |           |           |
|----|---|---|-----------|-----------|-----------|
| 9  | 7 | 0 | 7.132432  | 0.918655  | -0.067486 |
| 10 | 6 | 0 | 5.936617  | -0.262977 | 1.674291  |
| 11 | 6 | 0 | 7.123383  | -0.043824 | 0.936378  |
| 12 | 6 | 0 | 4.702506  | 0.461351  | 1.367736  |
| 13 | 7 | 0 | -3.060532 | -6.766067 | 0.824937  |
| 14 | 1 | 0 | -3.413496 | -6.648851 | 1.764304  |
| 15 | 6 | 0 | 4.822604  | 1.501361  | 0.381841  |
| 16 | 7 | 0 | -1.039873 | -6.064944 | 1.734585  |
| 17 | 1 | 0 | -1.552678 | -5.752081 | 2.546046  |
| 18 | 6 | 0 | 0.793721  | -2.435525 | -0.070318 |
| 19 | 1 | 0 | 0.615521  | -1.947470 | -1.017034 |
| 20 | 6 | 0 | 0.743828  | -4.345363 | 1.412375  |
| 21 | 6 | 0 | 8.301442  | -1.666845 | 2.113176  |
| 22 | 6 | 0 | 6.013394  | 1.664282  | -0.286106 |
| 23 | 1 | 0 | 6.073306  | 2.422985  | -1.055458 |
| 24 | 6 | 0 | 7.163482  | -1.947643 | 2.906615  |
| 25 | 1 | 0 | 7.220176  | -2.708578 | 3.677170  |
| 26 | 6 | 0 | 3.692413  | 2.395191  | -0.067910 |
| 27 | 6 | 0 | 0.483206  | -3.773022 | 0.155822  |
| 28 | 1 | 0 | 0.049389  | -4.373895 | -0.635616 |
| 29 | 6 | 0 | 1.607356  | -2.194785 | 2.107447  |
| 30 | 1 | 0 | 2.079417  | -1.538617 | 2.825340  |
| 31 | 6 | 0 | 5.989064  | -1.249531 | 2.678158  |
| 32 | 1 | 0 | 5.088218  | -1.439333 | 3.249287  |

|    |   |   |           |           |           |
|----|---|---|-----------|-----------|-----------|
| 33 | 6 | 0 | -1.706589 | -6.536640 | 0.619644  |
| 34 | 6 | 0 | 1.321309  | -3.527984 | 2.394304  |
| 35 | 1 | 0 | 1.556896  | -3.925539 | 3.376581  |
| 36 | 6 | 0 | -4.021985 | -7.189756 | -0.122609 |
| 37 | 6 | 0 | 8.272107  | 1.009651  | -1.018415 |
| 38 | 1 | 0 | 8.272004  | 2.032675  | -1.405305 |
| 39 | 1 | 0 | 9.188476  | 0.845238  | -0.451562 |
| 40 | 6 | 0 | 0.403406  | -5.798594 | 1.692795  |
| 41 | 1 | 0 | 0.810943  | -6.436962 | 0.904462  |
| 42 | 1 | 0 | 0.841498  | -6.110555 | 2.646539  |
| 43 | 6 | 0 | 9.597307  | -2.408539 | 2.309658  |
| 44 | 1 | 0 | 10.361531 | -1.997157 | 1.648027  |
| 45 | 1 | 0 | 9.478017  | -3.475921 | 2.083999  |
| 46 | 1 | 0 | 9.946134  | -2.332529 | 3.346750  |
| 47 | 6 | 0 | -3.717317 | -7.465605 | -1.468326 |
| 48 | 1 | 0 | -2.700481 | -7.362266 | -1.816374 |
| 49 | 6 | 0 | -4.732201 | -7.875900 | -2.338815 |
| 50 | 1 | 0 | -4.499467 | -8.088840 | -3.375002 |
| 51 | 6 | 0 | -6.035236 | -8.011441 | -1.869402 |
| 52 | 6 | 0 | -5.347762 | -7.334236 | 0.328396  |
| 53 | 1 | 0 | -5.594614 | -7.122247 | 1.365485  |
| 54 | 6 | 0 | -6.358424 | -7.745879 | -0.541290 |
| 55 | 1 | 0 | -7.376384 | -7.855330 | -0.188418 |
| 56 | 6 | 0 | 8.128632  | -0.013319 | -2.153105 |

|    |    |   |            |           |           |
|----|----|---|------------|-----------|-----------|
| 57 | 1  | 0 | 8.263123   | -1.028641 | -1.768417 |
| 58 | 1  | 0 | 8.891484   | 0.167544  | -2.919299 |
| 59 | 1  | 0 | 7.136306   | 0.046513  | -2.613282 |
| 60 | 17 | 0 | -10.043817 | 5.292092  | -0.109203 |
| 61 | 8  | 0 | 3.050788   | -0.517831 | -0.861152 |
| 62 | 8  | 0 | 0.399071   | 0.370370  | -1.173234 |
| 63 | 7  | 0 | 0.658774   | 0.904665  | 1.839929  |
| 64 | 8  | 0 | 4.355533   | -0.152843 | -2.688476 |
| 65 | 8  | 0 | -4.664063  | 2.623611  | 3.441384  |
| 66 | 7  | 0 | -0.147165  | 3.818389  | -4.488079 |
| 67 | 7  | 0 | 1.941987   | 2.811312  | -4.140720 |
| 68 | 6  | 0 | 0.046169   | 2.004949  | -2.870041 |
| 69 | 6  | 0 | 0.586629   | 2.885588  | -3.836095 |
| 70 | 6  | 0 | 0.892256   | 1.056796  | -2.143325 |
| 71 | 7  | 0 | -4.716782  | 4.830572  | 2.679828  |
| 72 | 1  | 0 | -4.213737  | 5.706776  | 2.689791  |
| 73 | 6  | 0 | 2.255332   | 0.970292  | -2.594576 |
| 74 | 7  | 0 | -2.847544  | 4.003397  | 3.783705  |
| 75 | 1  | 0 | -2.357408  | 4.843785  | 3.512743  |
| 76 | 6  | 0 | 1.128964   | 1.687193  | 2.841185  |
| 77 | 1  | 0 | 2.204358   | 1.758459  | 2.908369  |
| 78 | 6  | 0 | -1.116020  | 2.221874  | 3.571418  |
| 79 | 6  | 0 | -1.462521  | 3.912517  | -4.226465 |
| 80 | 6  | 0 | 2.707216   | 1.853312  | -3.546760 |

|     |   |   |           |          |           |
|-----|---|---|-----------|----------|-----------|
| 81  | 1 | 0 | 3.747767  | 1.805588 | -3.840522 |
| 82  | 6 | 0 | -2.090144 | 3.067757 | -3.280226 |
| 83  | 1 | 0 | -3.152807 | 3.169733 | -3.089829 |
| 84  | 6 | 0 | 3.292797  | 0.028855 | -2.032047 |
| 85  | 6 | 0 | 0.271339  | 2.349761 | 3.717947  |
| 86  | 1 | 0 | 0.690021  | 2.968995 | 4.504885  |
| 87  | 6 | 0 | -0.685531 | 0.765135 | 1.692227  |
| 88  | 1 | 0 | -1.006098 | 0.151871 | 0.861925  |
| 89  | 6 | 0 | -1.331888 | 2.125301 | -2.604580 |
| 90  | 1 | 0 | -1.764689 | 1.466743 | -1.861062 |
| 91  | 6 | 0 | -4.117409 | 3.745970 | 3.305645  |
| 92  | 6 | 0 | -1.591784 | 1.400597 | 2.533958  |
| 93  | 1 | 0 | -2.658580 | 1.271621 | 2.388470  |
| 94  | 6 | 0 | -5.978472 | 4.876823 | 2.042218  |
| 95  | 6 | 0 | 2.593409  | 3.866277 | -4.960859 |
| 96  | 1 | 0 | 3.475518  | 3.406259 | -5.415252 |
| 97  | 1 | 0 | 1.895588  | 4.149197 | -5.748859 |
| 98  | 6 | 0 | -2.079763 | 2.964024 | 4.480237  |
| 99  | 1 | 0 | -2.813636 | 2.271686 | 4.901533  |
| 100 | 1 | 0 | -1.534052 | 3.430060 | 5.306982  |
| 101 | 6 | 0 | -2.241602 | 4.950586 | -4.990429 |
| 102 | 1 | 0 | -1.557298 | 5.573484 | -5.569160 |
| 103 | 1 | 0 | -2.822675 | 5.589622 | -4.315009 |
| 104 | 1 | 0 | -2.951431 | 4.478963 | -5.682326 |

|     |   |   |           |          |           |
|-----|---|---|-----------|----------|-----------|
| 105 | 6 | 0 | -6.859894 | 3.781603 | 1.982316  |
| 106 | 1 | 0 | -6.580843 | 2.847476 | 2.446307  |
| 107 | 6 | 0 | -8.088573 | 3.915308 | 1.327624  |
| 108 | 1 | 0 | -8.768572 | 3.073506 | 1.280814  |
| 109 | 6 | 0 | -8.433787 | 5.129704 | 0.742248  |
| 110 | 6 | 0 | -6.350571 | 6.095128 | 1.442472  |
| 111 | 1 | 0 | -5.676984 | 6.947215 | 1.481738  |
| 112 | 6 | 0 | -7.578009 | 6.227032 | 0.791853  |
| 113 | 1 | 0 | -7.858457 | 7.166969 | 0.332908  |
| 114 | 6 | 0 | 2.979933  | 5.076082 | -4.099754 |
| 115 | 1 | 0 | 2.082882  | 5.601847 | -3.759221 |
| 116 | 1 | 0 | 3.586266  | 5.775768 | -4.686614 |
| 117 | 1 | 0 | 3.547712  | 4.764418 | -3.216095 |

-----

Table S13. Coordinates of the optimized structure of *TransCoNaturea*.

-----

| Center | Atomic | Atomic | Coordinates (Angstroms) |           |           |
|--------|--------|--------|-------------------------|-----------|-----------|
| Number | Number | Type   | X                       | Y         | Z         |
| 1      | 27     | 0      | -0.000025               | 0.000016  | -0.000030 |
| 2      | 17     | 0      | 14.205870               | -0.579411 | -1.525255 |
| 3      | 8      | 0      | -0.793527               | -1.919383 | 0.645412  |
| 4      | 8      | 0      | 0.472619                | -0.834888 | -1.694648 |
| 5      | 8      | 0      | 8.014270                | -2.360584 | 1.147026  |



|    |   |   |           |           |           |
|----|---|---|-----------|-----------|-----------|
| 6  | 7 | 0 | -0.589364 | -5.557075 | -1.331672 |
| 7  | 8 | 0 | 0.781540  | -2.339960 | -3.360668 |
| 8  | 7 | 0 | 1.756682  | -0.489823 | 0.738447  |
| 9  | 7 | 0 | 8.772249  | -0.154516 | 1.056559  |
| 10 | 1 | 0 | 8.530925  | 0.800490  | 1.281071  |
| 11 | 7 | 0 | -1.584821 | -6.656601 | 0.486518  |
| 12 | 6 | 0 | 4.267793  | -1.161322 | 1.800963  |
| 13 | 7 | 0 | 6.694968  | -0.654313 | 1.968609  |
| 14 | 1 | 0 | 6.582780  | 0.332285  | 2.151541  |
| 15 | 6 | 0 | 4.119301  | -0.823876 | 0.445544  |
| 16 | 1 | 0 | 4.977004  | -0.818656 | -0.217389 |
| 17 | 6 | 0 | -0.163571 | -3.161421 | -1.336640 |
| 18 | 6 | 0 | 0.401000  | -2.043871 | -2.195091 |
| 19 | 6 | 0 | -1.202631 | -4.253125 | 0.613424  |
| 20 | 6 | 0 | -0.708800 | -3.015771 | -0.007519 |
| 21 | 6 | 0 | 3.117859  | -1.149198 | 2.603950  |
| 22 | 1 | 0 | 3.178687  | -1.394565 | 3.659220  |
| 23 | 6 | 0 | -1.138963 | -5.497582 | -0.051908 |
| 24 | 6 | 0 | -0.136852 | -4.410705 | -1.916623 |
| 25 | 1 | 0 | 0.276533  | -4.490084 | -2.915494 |
| 26 | 6 | 0 | 10.037657 | -0.318939 | 0.447676  |
| 27 | 6 | 0 | 5.614553  | -1.549107 | 2.380284  |
| 28 | 1 | 0 | 5.546748  | -1.588258 | 3.475268  |
| 29 | 1 | 0 | 5.911843  | -2.546694 | 2.037482  |

|    |   |   |           |           |           |
|----|---|---|-----------|-----------|-----------|
| 30 | 6 | 0 | -1.761633 | -4.253105 | 1.906896  |
| 31 | 1 | 0 | -1.817155 | -3.308134 | 2.434981  |
| 32 | 6 | 0 | 1.884497  | -0.812011 | 2.049307  |
| 33 | 1 | 0 | 0.974893  | -0.760038 | 2.631612  |
| 34 | 6 | 0 | 2.861064  | -0.497277 | -0.052268 |
| 35 | 1 | 0 | 2.688698  | -0.252379 | -1.091313 |
| 36 | 6 | 0 | 7.844451  | -1.140050 | 1.373687  |
| 37 | 6 | 0 | -0.532043 | -6.847192 | -2.067984 |
| 38 | 1 | 0 | 0.304499  | -6.770027 | -2.767653 |
| 39 | 1 | 0 | -0.310467 | -7.626973 | -1.338817 |
| 40 | 6 | 0 | 10.551435 | -1.566274 | 0.046857  |
| 41 | 1 | 0 | 9.964359  | -2.458689 | 0.204243  |
| 42 | 6 | 0 | -2.114763 | -6.638523 | 1.723458  |
| 43 | 6 | 0 | -2.217518 | -5.437480 | 2.464300  |
| 44 | 1 | 0 | -2.649810 | -5.454412 | 3.458545  |
| 45 | 6 | 0 | 11.814427 | -1.636807 | -0.549795 |
| 46 | 1 | 0 | 12.211063 | -2.596129 | -0.859077 |
| 47 | 6 | 0 | 10.806603 | 0.842210  | 0.240243  |
| 48 | 1 | 0 | 10.419857 | 1.810902  | 0.546045  |
| 49 | 6 | 0 | 12.555177 | -0.474854 | -0.743977 |
| 50 | 6 | 0 | 12.066291 | 0.769671  | -0.355625 |
| 51 | 1 | 0 | 12.652652 | 1.666510  | -0.512672 |
| 52 | 6 | 0 | -2.592656 | -7.951170 | 2.285215  |
| 53 | 1 | 0 | -3.659895 | -7.909842 | 2.535761  |

|    |    |   |            |           |           |
|----|----|---|------------|-----------|-----------|
| 54 | 1  | 0 | -2.053747  | -8.206239 | 3.206143  |
| 55 | 1  | 0 | -2.433290  | -8.746183 | 1.554787  |
| 56 | 6  | 0 | -1.838235  | -7.159763 | -2.804955 |
| 57 | 1  | 0 | -2.661605  | -7.267432 | -2.093310 |
| 58 | 1  | 0 | -1.736637  | -8.100621 | -3.357671 |
| 59 | 1  | 0 | -2.088356  | -6.368769 | -3.520290 |
| 60 | 17 | 0 | -14.205735 | 0.579268  | 1.525545  |
| 61 | 8  | 0 | 0.793477   | 1.919416  | -0.645475 |
| 62 | 8  | 0 | -0.472667  | 0.834919  | 1.694587  |
| 63 | 8  | 0 | -8.014217  | 2.360566  | -1.146885 |
| 64 | 7  | 0 | 0.589364   | 5.557098  | 1.331635  |
| 65 | 8  | 0 | -0.781571  | 2.339987  | 3.360615  |
| 66 | 7  | 0 | -1.756731  | 0.489857  | -0.738510 |
| 67 | 7  | 0 | -8.772260  | 0.154511  | -1.056600 |
| 68 | 1  | 0 | -8.530985  | -0.800476 | -1.281246 |
| 69 | 7  | 0 | 1.584827   | 6.656624  | -0.486551 |
| 70 | 6  | 0 | -4.267838  | 1.161357  | -1.801035 |
| 71 | 7  | 0 | -6.695015  | 0.654337  | -1.968715 |
| 72 | 1  | 0 | -6.582852  | -0.332250 | -2.151717 |
| 73 | 6  | 0 | -4.119351  | 0.823914  | -0.445615 |
| 74 | 1  | 0 | -4.977056  | 0.818698  | 0.217316  |
| 75 | 6  | 0 | 0.163545   | 3.161448  | 1.336589  |
| 76 | 6  | 0 | -0.401036  | 2.043899  | 2.195035  |
| 77 | 6  | 0 | 1.202610   | 4.253153  | -0.613472 |

|     |   |   |            |          |           |
|-----|---|---|------------|----------|-----------|
| 78  | 6 | 0 | 0.708767   | 3.015801 | 0.007465  |
| 79  | 6 | 0 | -3.117901  | 1.149231 | -2.604018 |
| 80  | 1 | 0 | -3.178726  | 1.394597 | -3.659289 |
| 81  | 6 | 0 | 1.138958   | 5.497606 | 0.051868  |
| 82  | 6 | 0 | 0.136842   | 4.410729 | 1.916580  |
| 83  | 1 | 0 | -0.276539  | 4.490106 | 2.915453  |
| 84  | 6 | 0 | -10.037631 | 0.318903 | -0.447631 |
| 85  | 6 | 0 | -5.614597  | 1.549140 | -2.380363 |
| 86  | 1 | 0 | -5.546782  | 1.588301 | -3.475346 |
| 87  | 1 | 0 | -5.911894  | 2.546721 | -2.037549 |
| 88  | 6 | 0 | 1.761606   | 4.253135 | -1.906946 |
| 89  | 1 | 0 | 1.817115   | 3.308167 | -2.435038 |
| 90  | 6 | 0 | -1.884541  | 0.812044 | -2.049371 |
| 91  | 1 | 0 | -0.974935  | 0.760069 | -2.631673 |
| 92  | 6 | 0 | -2.861116  | 0.497315 | 0.052201  |
| 93  | 1 | 0 | -2.688753  | 0.252418 | 1.091247  |
| 94  | 6 | 0 | -7.844448  | 1.140048 | -1.373675 |
| 95  | 6 | 0 | 0.532059   | 6.847211 | 2.067955  |
| 96  | 1 | 0 | -0.304481  | 6.770049 | 2.767627  |
| 97  | 1 | 0 | 0.310486   | 7.626998 | 1.338794  |
| 98  | 6 | 0 | -10.551350 | 1.566206 | -0.046637 |
| 99  | 1 | 0 | -9.964256  | 2.458622 | -0.203948 |
| 100 | 6 | 0 | 2.114764   | 6.638548 | -1.723494 |
| 101 | 6 | 0 | 2.217502   | 5.437508 | -2.464344 |

|     |   |   |            |           |           |
|-----|---|---|------------|-----------|-----------|
| 102 | 1 | 0 | 2.649790   | 5.454442  | -3.458592 |
| 103 | 6 | 0 | -11.814310 | 1.636707  | 0.550089  |
| 104 | 1 | 0 | -12.210900 | 2.596005  | 0.859505  |
| 105 | 6 | 0 | -10.806602 | -0.842247 | -0.240295 |
| 106 | 1 | 0 | -10.419901 | -1.810915 | -0.546232 |
| 107 | 6 | 0 | -12.555085 | 0.474754  | 0.744170  |
| 108 | 6 | 0 | -12.066257 | -0.769740 | 0.355646  |
| 109 | 1 | 0 | -12.652638 | -1.666579 | 0.512616  |
| 110 | 6 | 0 | 2.592672   | 7.951193  | -2.285244 |
| 111 | 1 | 0 | 3.659919   | 7.909865  | -2.535756 |
| 112 | 1 | 0 | 2.053791   | 8.206256  | -3.206189 |
| 113 | 1 | 0 | 2.433284   | 8.746209  | -1.554823 |
| 114 | 6 | 0 | 1.838257   | 7.159765  | 2.804922  |
| 115 | 1 | 0 | 2.661624   | 7.267432  | 2.093273  |
| 116 | 1 | 0 | 1.736669   | 8.100621  | 3.357644  |
| 117 | 1 | 0 | 2.088374   | 6.368766  | 3.520251  |

---

**Reference:**

1. G. A. Bain and J. F. Berry, *J. Chem. Educ.*, 2008, **85**, 532–536.
2. D. F. Evans, *J. Chem. Soc.*, 1959, 2003–2005.
3. K. De Buysser, G. G. Herman, E. Bruneel, S. Hoste and I. Van Driessche, *Chem. Phys.*, 2005, **315**, 286–292.
